1

2

3 ***C. elegans* CLASP/CLS-2 negatively regulates membrane ingression**

4 **throughout the oocyte cortex and is required for polar body extrusion**

5

6 Aleesa J. Schlientz<sup>1</sup> and Bruce Bowerman<sup>1</sup>

7 Institute of Molecular Biology, University of Oregon, Eugene, OR 97403

8

9 <sup>1</sup>Institute of Molecular Biology, 1229 University of Oregon, Eugene, Oregon 97403, USA

10 \*Corresponding author (bowerman@uoregon.edu)

11

12

13 **Short Title:** Spindle structure and polar body extrusion

14

15

16 **Abstract**

17           The requirements for oocyte meiotic cytokinesis during polar body extrusion are  
18 not well understood. In particular, the relationship between the oocyte meiotic spindle  
19 and polar body contractile ring dynamics remains largely unknown. We have used live  
20 cell imaging and spindle assembly defective mutants lacking the function of  
21 CLASP/CLS-2, kinesin-12/KLP-18, or katanin/MEI-1 to investigate the relationship  
22 between meiotic spindle structure and polar body extrusion in *C. elegans* oocytes. We  
23 show that spindle bipolarity and chromosome segregation are not required for polar  
24 body contractile ring formation and chromosome extrusion in *klp-18* mutants, but  
25 oocytes with severe spindle assembly defects due to loss of CLS-2 or MEI-1 have  
26 penetrant and distinct polar body extrusion defects: CLS-2 is required early for  
27 contractile ring assembly or stability, while MEI-1 is required later for contractile ring  
28 constriction. We also show that CLS-2 negatively regulates membrane ingression  
29 throughout the oocyte cortex during meiosis I, and we explore the relationship between  
30 global cortical dynamics and oocyte meiotic cytokinesis.

31

## 32 **Author Summary**

33           The precursor cells that produce gametes—sperm and eggs in animals—have  
34 two copies of each chromosome, one from each parent. These precursors undergo  
35 specialized cell divisions that leave each gamete with only one copy of each  
36 chromosome; defects that produce incorrect chromosome number cause severe  
37 developmental abnormalities. In oocytes, these cell divisions are highly asymmetric,  
38 with extra chromosomes discarded into small membrane bound polar bodies, leaving  
39 one chromosome set within the much larger oocyte. How oocytes assemble the  
40 contractile apparatus that pinches off polar bodies remains poorly understood. To better  
41 understand this process, we have used the nematode *Caenorhabditis elegans* to  
42 investigate the relationship between the bipolar structure that separates oocyte  
43 chromosomes, called the spindle, and assembly of the contractile apparatus that  
44 pinches off polar bodies. We used a comparative approach, examining this relationship  
45 in three spindle assembly defective mutants. Bipolar spindle assembly and  
46 chromosome separation were not required for polar body extrusion, as it occurred  
47 normally in mutants lacking a protein called KLP-18. However, mutants lacking the  
48 protein CLS-2 failed to assemble the contractile apparatus, while mutants lacking the  
49 protein MEI-1 assembled a contractile apparatus that failed to fully constrict. We also  
50 found that CLS-2 down-regulates membrane ingression throughout the oocyte surface,  
51 and we explored the relationship between oocyte membrane dynamics and polar body  
52 extrusion.

## 53 **Introduction**

54 Oocyte meiosis comprises a single round of genome replication followed by two  
55 highly asymmetric cell divisions that produce a single haploid gamete and two small  
56 polar bodies that contain discarded chromosomes (1-4). An acentrosomal spindle  
57 segregates homologous chromosomes during the first reductional division, called  
58 meiosis I, and half of the recombined homologs are extruded into the first polar body.  
59 The equational meiosis II division then segregates sister chromatids, with half extruded  
60 into a second polar body and half remaining in the oocyte cytoplasm. Despite being  
61 essential for reducing oocyte ploidy, little is known about the cues that organize and  
62 influence the actomyosin contractile ring that mediates polar body extrusion.

63 The oocyte contractile ring initially forms distal to the membrane-proximal meiotic  
64 spindle pole, with the spindle axis oriented orthogonally to the overlying cell cortex (5).  
65 During anaphase the contractile ring ingresses past both the membrane-proximal pole  
66 and one set of the segregating chromosomes to then constrict and ultimately separate  
67 the nascent polar body from the oocyte. These dynamics contrast substantially with  
68 mitotic cytokinesis (Fig 1A), during which signals from astral microtubules and the  
69 central spindle position the contractile ring midway between the two spindle poles (6-8).  
70 While the signals required for contractile ring assembly and constriction during mitotic  
71 cytokinesis are relatively well understood, how oocyte meiotic spindles influence  
72 contractile ring dynamics during polar body extrusion is not known.

73 In *Caenorhabditis elegans*, several genes are required for polar body extrusion,  
74 but how their functions are coordinated remains poorly understood. Similar to mitotic  
75 cytokinesis, polar body cytokinesis requires filamentous actin and the non-muscle

76 myosin II heavy-chain NMY-2 and light-chains MLC-4 and MLC-5 (9-11). The  
77 cytoskeletal scaffolding protein anillin/ANI-1 facilitates transformation of the initial  
78 actomyosin contractile ring into a midbody tube, with anillin depletion resulting in large  
79 and unstable polar bodies that often fuse with the oocyte (12). Consistent with its role as  
80 a key activator of cortical actomyosin, the small GTPase RhoA (RHO-1) and its  
81 RhoGEF ECT-2 also are required for oocyte polar body extrusion (10, 13). Knockdown  
82 of the centralspindlin complex, comprised of MgcRacGAP/CYK-4 and kinesin-6/ZEN-4,  
83 results in the assembly of abnormally large contractile rings and a subsequent failure in  
84 extrusion (10). Finally, the chromosomal passenger complex (CPC) member Aurora  
85 B/AIR-2 also is required (14).

86       Formation of the contractile ring distal to both meiotic spindle poles raises the  
87 question of how the ring moves relative to the spindle such that it constricts midway  
88 between segregating chromosomes. One mechanism proposed for *C. elegans* is that  
89 global contraction of actomyosin throughout the oocyte cortex produces a hydrostatic  
90 cytoplasmic force that, combined with depletion of cortical actomyosin overlying the  
91 membrane-proximal pole, leads to an out-pocketing of the membrane within the  
92 contractile ring and pushes the spindle into the protruding pocket (10, 15). In support of  
93 this hypothesis, increased global cortical contractility due to depletion of casein kinase 1  
94 gamma (CSNK-1), a negative regulator of RhoA activity, often results in extrusion of the  
95 entire meiotic spindle (15). However, assessing whether global cortical contractility is  
96 required for polar body extrusion has been challenging due to the overlap in  
97 requirements for global cortical contractility and polar body contractile ring assembly  
98 and constriction.

99           Despite a stereotyped spatial relationship between the oocyte meiotic spindle  
100 and contractile ring assembly and ingression, little is known about how the spindle might  
101 influence ring assembly and dynamics. Nevertheless, four observations suggest that the  
102 meiotic spindle provides important cues. First, meiotic spindles that fail to translocate to  
103 the oocyte cortex induce the formation of membrane furrows that ingress deeply  
104 towards the displaced spindle (10). Second, loss of the centralspindlin complex, which  
105 localizes to the central spindle during anaphase, results in the formation of rings with an  
106 abnormally large diameter (10). Third katanin/*mei-1* mutants, which assemble apolar  
107 spindles, produce very large polar bodies (16, 17) . Finally, while work in mice suggests  
108 that chromosomes themselves may provide cues for ring assembly and polar body  
109 extrusion via the small GTPase Ran (18, 19), knock down of *C. elegans* RAN-1 does  
110 not prevent polar body extrusion (20, 21). These findings suggest that in *C. elegans* the  
111 oocyte meiotic spindle provides cues that influence contractile ring assembly and  
112 ingression.

113           To explore the relationship between meiotic spindle assembly and polar body  
114 extrusion, we have examined oocyte cortical actomyosin dynamics in three spindle  
115 assembly defective mutants that each lack the function of a conserved protein:  
116 CLASP/CLS-2, kinesin-12/KLP-18, or katanin/MEI-1 (Fig 1B). CLASP family proteins  
117 promote microtubule stability through their association with microtubules and their  
118 tubulin heterodimer-binding TOG (Tumor Over-expressed Gene) domains, decreasing  
119 the frequency of microtubule catastrophe and promoting rescue of de-polymerizing  
120 microtubules (22-25). Moreover, human CLASPs have been shown to influence not only  
121 microtubule stability and dynamics, but also to interact with actin filaments and

122 potentially crosslink filamentous actin and microtubules (26). CLS-2 is one of three *C.*  
123 *elegans* CLASPs and is required for mitotic central spindle stability as well as oocyte  
124 meiotic spindle assembly and chromosome segregation (27-30). Vertebrate kinesin-  
125 12/KLP-18 family members promote mitotic spindle bipolarity by contributing to forces  
126 that push apart anti-parallel microtubules (31-33). Consistent with such a function, *C.*  
127 *elegans* oocytes lacking the kinesin-12 family member KLP-18 form monopolar meiotic  
128 spindles that draw chromosomes towards a single spindle pole and thus fail in  
129 chromosome segregation (34-36). The widely conserved microtubule severing complex  
130 katanin is encoded by two *C. elegans* genes, *mei-1* and *mei-2* (37, 38). Loss of either  
131 subunit results in the formation of apolar meiotic spindles that fail to congress or  
132 segregate chromosomes (34, 39, 40).

133         Here we report our use of fluorescent protein fusions and live cell imaging to  
134 characterize polar body extrusion during meiosis I in mutants lacking the function of  
135 CLS-2, KLP-18 or MEI-1. Previous studies indicate that both CLS-2 and MEI-1 are  
136 involved in polar body extrusion, with oocytes lacking CLS-2 frequently failing to extrude  
137 polar bodies (27, 30, 41), and oocytes lacking MEI-1 forming very large polar bodies  
138 (16, 17, 42, 43). Furthermore, *klp-18* mutants sometimes lack an oocyte pronucleus,  
139 suggesting that all oocyte chromosomes can be extruded (34). However, the process of  
140 polar body extrusion has not been directly examined in any of these mutants. Our live  
141 imaging of contractile ring assembly and ingression in these mutant backgrounds shows  
142 that bipolar spindle assembly and chromosome segregation are not required for oocyte  
143 contractile ring assembly and polar body extrusion. However, CLS-2 is required for  
144 proper contractile ring assembly or stability and also acts as a negative regulator of

145 global cortical membrane ingressions, while MEI-1 may be required late in polar body  
146 extrusion for contractile ring constriction.

147

## 148 **Results**

### 149 **CLS-2 is required for oocyte meiotic spindle assembly and polar body extrusion**

150 To investigate the role of CLS-2, we first examined the localization of a CLS-  
151 2::GFP fusion in live oocytes (Fig 2A, S1 Fig, S1 and S2 Movies). Consistent with  
152 previous reports, CLS-2::GFP initially localized to meiosis I spindle microtubules and  
153 kinetochore cups, and to small patches dispersed throughout the oocyte cortex (27, 30,  
154 41). Around the time of anaphase onset, the cortical CLS-2::GFP patches disappeared  
155 and CLS-2::GFP localized to the central spindle between the segregating chromosomes  
156 (27, 30, 41). These results suggest that CLS-2 might have roles not only at the oocyte  
157 meiotic spindle but also throughout the oocyte cortex.

158 Previous studies of CLS-2 requirements have used RNA interference (RNAi) or  
159 auxin-induced degradation of degron-tagged CLS-2 to reduce its function and have  
160 emphasized its central spindle function. To more definitively assess its roles during  
161 oocyte meiosis, we used CRISPR/Cas9 to generate putative null alleles. Each of the  
162 four alleles we isolated contains small insertions or deletions that result in frame shifts  
163 and premature stop codons before the first TOG domain, likely making them null (Fig  
164 2B, S1 Fig). All are recessive, and homozygous mutant hermaphrodites exhibit fully  
165 penetrant embryonic lethality (Fig 2C). To investigate CLS-2 requirements, we have  
166 used the *cls-2(or1948)* allele, and hereafter we refer to oocytes from homozygous *cls-*  
167 *2(or1948)* hermaphrodites as *cls-2* mutants.



168           We first used *ex utero* live cell imaging with transgenic strains that express GFP  
169 fused to a  $\beta$ -tubulin (GFP::TBB-2) and mCherry fused to a histone H2B (mCherry::H2B)  
170 to examine microtubule and chromosome dynamics during meiosis I in control and *c/s-2*  
171 mutant oocytes (Fig 2D; see Materials and methods). Control oocytes formed barrel  
172 shaped bipolar spindles that shortened and rotated to become perpendicular to the  
173 oocyte cortex prior to anaphase and polar body extrusion (n=19). Consistent with  
174 previous reports (27, 30, 41), the meiosis I spindles in *c/s-2* mutants were disorganized  
175 and lacked any obvious bipolarity, with chromosomes moving into a small cluster before  
176 failing to segregate (n=13). Furthermore, microtubule levels appeared to be reduced,  
177 and quantification of the integrated spindle microtubule intensity over time showed a  
178 substantial reduction in microtubule levels throughout meiosis I compared to control  
179 oocytes (Fig 2E), consistent with the established roles of CLASP family members in  
180 promoting microtubule stability (see Introduction). To assess when defects in meiosis I  
181 spindle assembly first appear in *c/s-2* oocytes, we used *in utero* live cell imaging and  
182 observed the early assembly of a normal cage-like microtubule structure that  
183 surrounded the oocyte chromosomes, followed by a rapid collapse of this microtubule  
184 structure to form an abnormally small cluster associated with the oocyte chromosomes  
185 (S1 Fig) (n=5). To further examine spindle assembly in *c/s-2* mutants, we also imaged  
186 meiosis I in oocytes from transgenic strains expressing an endogenous fusion of GFP to  
187 the pole marker ASPM-1 and mCherry::H2B (Fig 2F). As described previously (44),  
188 multiple small GFP::ASPM-1 foci coalesced to form a bipolar spindle in control oocytes  
189 (n=14). In *c/s-2* mutants, the GFP::ASPM-1 foci failed to coalesce to form two spindle  
190 poles but rather moved over time to form a single tight cluster of multiple small foci, and

191 chromosomes again moved into a small cluster and failed to segregate (n=11). We  
192 conclude that CLS-2 plays an important role in promoting microtubule stability  
193 throughout meiosis I and is required early in bipolar spindle assembly and for  
194 chromosome segregation.

195 In addition to the extensive meiotic spindle defects, we also observed that *c/s-2*  
196 mutants frequently failed to extrude a polar body at the end of meiosis I, consistent with  
197 previous reports (27, 30). Control oocytes regularly extruded a polar body at the end of  
198 meiosis I, as scored using transgenic strains expressing either GFP::H2B or  
199 mCherry::H2B and observing whether oocyte chromosomes remained extruded for the  
200 duration of live imaging (93 of 94 oocytes; Fig 2G). In contrast, polar body extrusion  
201 failed in about 84% of the *c/s-2* mutant oocytes (80 of 95, Fig 2G). This finding suggests  
202 that CLS-2 might play a direct role in polar body extrusion, or that the spindle defects  
203 observed in *c/s-2* mutants might indirectly disrupt extrusion.

204

205 **Polar body extrusion defects in *c/s-2* mutants are not due to absence of the**  
206 **central spindle-associated proteins AuroraB/AIR-2 or MgcRacGAP/CYK-4**

207 Because *c/s-2* mutant oocytes fail to assemble a central spindle or segregate  
208 chromosomes and CLS-2::GFP localizes to the central spindle, and because the central  
209 spindle-associated protein AuroraB/AIR-2 and the centralspindlin component  
210 MgcRacGAP/CYK-4 are required for polar body extrusion (10, 14, 27, 45), we first  
211 considered whether the polar body extrusion defects might be due to a failure to localize  
212 central spindle proteins to the disorganized spindle microtubules in *c/s-2* oocytes. To  
213 address this possibility, we used transgenic strains expressing GFP fusions to either

214 AIR-2 or CYK-4 and examined their localization in control and *c/s-2* mutant oocytes. As  
215 reported previously, both proteins localized to the central spindle during anaphase in  
216 control oocytes (Figs 3A and 3B) (n=12 GFP::AIR-2 and n=12 CYK-4::GFP). In *c/s-2*  
217 mutants, despite the lack of spindle organization, both AIR-2 and CYK-4 localized to the  
218 spindle region (Figs 3A and 3B) (n=15 GFP::AIR-2 and n=11 CYK-4::GFP). While we  
219 cannot rule out the possibility that improper localization of AIR-2 and CYK-4 to the  
220 defective spindle might be responsible for the failure to extrude polar bodies in *c/s-2*  
221 mutants, this failure cannot be explained by a simple loss of these central spindle-  
222 associated proteins from the mutant spindle microtubules.

223

#### 224 **CLS-2 and MEI-1, but not spindle bipolarity, are required for polar body extrusion**

225 Because the relationship between spindle structure and polar body extrusion is  
226 unclear, we next took a comparative approach and also examined meiosis I polar body  
227 extrusion after using RNAi to knock down either kinesin-12/KLP-18 or katanin/MEI-1. As  
228 illustrated schematically in Fig 1B, *klp-18* mutants assemble monopolar spindles while  
229 *mei-1* spindles are apolar, and both fail to segregate chromosomes (see Introduction).  
230 We first simply assessed whether polar body extrusion was successful, again using live  
231 imaging with transgenic strains expressing either GFP::H2B or mCherry::H2B fusions  
232 and scoring whether chromosomes were retained in polar bodies for the duration of  
233 imaging (Fig 2G). In *klp-18* mutants, chromosomes were successfully retained in a polar  
234 body in 15 of 20 oocytes. In contrast, after MEI-1 knockdown, chromosomes were  
235 extruded and retained in a polar body in only 5 of 27 oocytes. The absence of meiosis I  
236 polar body extrusion in *mei-1* mutant oocytes was surprising because *mei-1* mutants

237 were originally described as typically having abnormally large polar bodies (16, 17), but  
238 how often polar body extrusion succeeds or fails has not been reported. Our data  
239 indicate that meiosis I polar body extrusion usually fails and suggest that the abnormally  
240 large polar bodies observed in *mei-1* mutants result from defects in meiosis II (see  
241 Discussion).

242         Based on the frequent success of polar body extrusion in *klp-18* mutants, we  
243 conclude that spindle bipolarity and chromosome segregation are not required for polar  
244 body extrusion. Thus, the failed extrusions in *cls-2* and *mei-1* mutants are not simply  
245 due to an absence of spindle bipolarity or a failure to segregate chromosomes.

246

247 **Meiotic spindle-associated furrows are abnormal in *cls-2* and *mei-1* mutant**  
248 **oocytes**

249         To better understand the polar body extrusion defects in oocytes lacking CLS-2  
250 or MEI-1, we next examined the spindle-associated membrane furrows that mediate  
251 polar body extrusion in transgenic strains expressing mCherry fused to a plasma  
252 membrane marker (mCherry::PH) and GFP::H2B (Figs 4A and 4B, S2 Fig, S3 and S4  
253 Movies). In 9 of 16 control oocytes, we observed early membrane furrows that  
254 ingressed until they pinched together to encapsulate and extrude chromosomes into the  
255 first polar body. In 6 of 16 control oocytes we observed early membrane furrows that  
256 were not as clearly resolved in our imaging data but eventually led to polar body  
257 extrusion, and in one oocyte furrows were not obvious but a polar body was  
258 nevertheless extruded.

259           In contrast, we observed extensive spindle-associated membrane furrowing  
260 defects in *c/s-2* mutants (Figs 4C-E, S3 and S4 Figs, S5 and S6 Movies). In 7 of 19  
261 oocytes we observed two furrows in cross-section that retracted before pinching  
262 together, one oocyte that formed two furrows that pinched together but failed late in  
263 polar body extrusion, and one oocyte that formed two furrows and successfully extruded  
264 a polar body (S3 Fig). One of 19 oocytes appeared to form three spindle-associated  
265 furrows in cross-section and extruded a polar body (S3 Fig). In 7 of 19 oocytes we  
266 observed only a single visible spindle-associated furrow in cross-section that ingressed  
267 either to one side of, or directly toward the oocyte chromosomes (Fig 4D, S4 Fig),  
268 suggesting that the contractile ring collapsed into a more linear ingressing structure  
269 rather than maintaining a ring-like shape. Finally, in one oocyte the membrane  
270 dynamics were indistinct, but chromosomes were extruded into a polar body (Fig 4E),  
271 and in one oocyte there was no obvious spindle-associated furrowing and polar body  
272 extrusion failed (S4 Fig).

273           In oocytes depleted of *k/p-18*, we observed furrows that more nearly resembled  
274 those in control oocytes (Figs 4F and G, S5 Fig, S7 and S8 Movies). In 4 of 10 oocytes,  
275 we observed two furrows in cross-section that ingressed more deeply and then pinched  
276 together (Fig 4F), and only 1 of these 4 failed in polar body extrusion. In 6 of 10  
277 oocytes, we observed shallow furrows adjacent to the oocyte chromosomes (Fig 4G),  
278 and only 1 of these 6 failed to extrude a polar body.

279           After MEI-1 knockdown, we observed furrows that initially resembled those in  
280 control oocytes but were more widely spaced and often failed late during constriction  
281 (Figs 4H-J, S6 Fig, S9 and S10 Movies). In 2 of 11 oocytes, we observed two furrows in

282 cross-section that ingressed and pinched together to extrude a polar body (Fig 4H). In 3  
283 of 11 oocytes two furrows ingressed and pinched together but then regressed and  
284 released chromosomes back into the oocyte cytoplasm (Fig 4I). In 5 of 11 oocytes two  
285 furrows ingressed but retracted before pinching together and failed in polar body  
286 extrusion (Fig 4J), and finally in 1 of 11 oocytes we observed only a single spindle-  
287 associated furrow in cross-section that failed to extrude a polar body.

288 To summarize, in *klp-18* mutant oocytes we observed spindle-associated furrows  
289 that usually encapsulated chromosomes and extruded polar bodies, although the oocyte  
290 chromosomes were often in close proximity to the membrane with furrows that were  
291 shallow and difficult to detect. In *cls-2* and *mei-1* mutants, meiosis 1 polar body  
292 extrusion frequently failed but we observed distinct defects. While membrane furrowing  
293 initially appeared normal but eventually failed in most *mei-1* mutant oocytes, *cls-2*  
294 oocytes often appeared abnormal early in furrow ingression and exhibited more severe  
295 defects as extrusion attempts progressed.

296

297 **Polar body contractile ring dynamics are more severely defective in the absence**  
298 **of CLS-2 than in *klp-18* or *mei-1* mutant oocytes.**

299 We next examined assembly and ingression of the contractile ring during oocyte  
300 meiosis I, using live cell imaging with transgenic strains expressing both a GFP fusion to  
301 the non-muscle myosin II NMY-2 and mCherry::H2B. In 11 of 11 control oocytes, NMY-  
302 2::GFP foci initially assembled into discontinuous but discernible rings over the  
303 membrane proximal pole, after spindle rotation and before extensive chromosome  
304 segregation, and then became more continuous and prominent as they ingressed and

305 constricted between the segregating chromosomes to extrude polar bodies (Fig 5A, S7  
306 Fig, S11 and S12 Movies).

307 In *c/s-2* mutant oocytes, the assembly and stability of NYM-2::GFP contractile  
308 ring structures were severely defective (Fig 5B, S8 Fig, S13 and S14 Movies). In 7 of 11  
309 oocytes, fragmented or partial contractile rings assembled and 6 of these oocytes failed  
310 to extrude a polar body, while 3 of 11 oocytes formed abnormal assemblies of  
311 NMY2::GFP that were more linear and not ring-like, although 2 of these extruded a  
312 polar body. Finally, 1 of 11 oocytes formed a relatively normal looking contractile ring  
313 that extruded a polar body. The fragmented or partial contractile rings observed in *c/s-2*  
314 mutants often collapsed into single bright foci or bands during constriction.

315 Contractile ring assembly and dynamics appeared much more normal in *k1p-18*  
316 mutant oocytes (Fig 5C, S9 Fig, S15 and S16 Movies). In 10 of 10 oocytes after KLP-18  
317 knockdown, NMY-2::GFP foci assembled into rings that ingressed and constricted with  
318 dynamics similar to those observed in control oocytes, and in 9 of the 10 oocytes  
319 chromosomes were stably extruded into polar bodies.

320 In MEI-1 knockdown oocytes, ring assembly and ingression were much more  
321 normal compared to *c/s-2* mutants, but we nevertheless observed a range of later  
322 defects and eventual failures to extrude polar bodies (Fig 5D, S10 Fig, S17 and S18  
323 Movies). In 11 of 13 oocytes, the NMY-2::GFP rings that initially formed were larger in  
324 diameter compared to control oocytes, and in 3 of these 11 oocytes the rings  
325 constricted and successfully extruded a polar body. In another 5 of these 11 oocytes,  
326 the rings constricted extensively but ultimately regressed and failed at polar body  
327 extrusion, while in 3 the rings ingressed and only constricted partially before regressing

328 and failing to extrude polar bodies. Finally, in 2 of 13 oocytes, ring assembly and  
329 ingression were more defective and polar body extrusion failed.

330 To further characterize the polar body extrusion defects in *cls-2* mutants, we also  
331 examined ring assembly and dynamics in transgenic strains expressing mNeonGreen  
332 fused to the anillin ANI-1 (mNG::ANI-1), which is dispensable for assembly of the  
333 actomyosin contractile ring but required for its conversion from a ring to a tube during  
334 constriction (46), and mCherry::H2B (Fig 6A, S19 and S20 Movies). In 10 of 10 control  
335 oocytes, mNG::ANI-1 assembled into contractile rings that ingressed and constricted  
336 between segregating chromosomes to extrude a polar body, while in 10 of 10 *cls-2*  
337 oocytes a fragmented contractile ring structure formed and failed to extrude a polar  
338 body. We also used two-color live imaging to examine NMY-2::mKate2 and mNG::ANI-1  
339 simultaneously, and observed that these two contractile ring components were co-  
340 localized in both control and *cls-2* mutant oocytes (Fig 6B, S21 and S22 Movies) (n=11  
341 control, n=13 *cls-2(or1948)*). We conclude that CLS-2 is required for proper ring  
342 assembly and ingression dynamics of not only NMY-2 but also ANI-1.

343

### 344 **CLS-2 negatively regulates membrane ingression throughout the oocyte cortex** 345 **during meiosis I**

346 Global contraction of the oocyte actomyosin cortex has been proposed to  
347 promote polar body extrusion by generating a hydrostatic cytoplasmic force that (i)  
348 produces an out-pocketing of the actomyosin depleted membrane inside the meiotic  
349 contractile ring, and (ii) pushes the spindle partially into the extruded membrane pocket  
350 (see Introduction). To explore the relationship between spindle structure, global cortical



351 contractility and polar body extrusion, we next examined membrane ingressions  
352 throughout the oocyte cortex during meiosis I in control and mutant oocytes, using  
353 transgenic strains expressing mCherry::PH and GFP::H2B fusions. To document these  
354 membrane ingressions, we used temporal overlays of a single central z-plane to portray  
355 simultaneously the membrane position at all time points throughout the period of global  
356 cortical furrowing. In control oocytes, we observed the spindle-associated furrows and a  
357 small number of additional furrows along the oocyte cortex (Fig 7A, S11 Fig) (n=16).

358 In contrast, *cls-2* mutant oocytes exhibited more extensive cortical furrowing  
359 compared to control oocytes (n=24), while oocytes depleted of either KLP-18 or MEI-1  
360 more nearly resembled control oocytes (Fig 7A, S12 and S13 Figs, S3-10 Movies)  
361 (n=10 *klp-18(RNAi)* and n=14 *mei-1(RNAi)*). Quantification of global cortical furrowing  
362 showed that *cls-2* oocytes had significantly more furrows compared to control and *klp-*  
363 *18* oocytes (Fig 7B). We conclude that CLS-2 negatively regulates global cortical  
364 furrowing, and we suspect that the CLS-2::GFP patches detected throughout the oocyte  
365 cortex are responsible for this regulation (Fig 2A, S1 Fig, S1 and S2 Movies; see  
366 Discussion).

367 We next examined the dynamics of the cortical actomyosin cytoskeleton, which  
368 mediates the furrowing that occurs throughout the oocyte cortex during polar body  
369 extrusion. In control oocytes, NMY-2 and ANI-1 localized to dynamic patches  
370 throughout the oocyte cortex during meiosis I contractile ring assembly and ingression,  
371 and then dissipated late in anaphase when global cortical furrowing ends (Figs 7C and  
372 7D, S14 and S15 Figs, S23 and S24 Movies) (n=11 NMY-2::GFP, n=10 mNG::ANI-1).  
373 To determine if the increased global cortical furrowing in *cls-2* oocytes is caused by an

374 increase in NMY-2 or ANI-1 patch size or duration, we examined the dynamics of NMY-  
375 2::GFP and mNG::ANI-1 and observed dynamics similar to those in control oocytes  
376 (Figs 7C and 7D, S16-18 Figs, S25 and S26 Movies) (n=11 NMY-2::GFP, n=10  
377 mNG::ANI-1), and we did not detect any statistically significant difference in the area  
378 occupied by the cortical NMY-2::GFP patches throughout the period of global cortical  
379 furrowing and polar body extrusion. These data suggest that the excess global cortical  
380 furrowing observed in *c/s-2* oocytes is not due to altered NMY-2 or ANI-1 patch  
381 dynamics. While the increased global cortical furrowing in CSNK-1 knockdown oocytes  
382 is associated with altered NMY-2 and ANI-1 cortical patch dynamics and with extrusion  
383 of the entire meiosis I spindle into polar bodies (15), the increased global cortical  
384 furrowing in *c/s-2* mutants does not correlate with altered cortical patch dynamics and is  
385 instead associated with polar body extrusion failure. Thus, the relationship between  
386 global cortical furrowing and polar body extrusion is complex and requires further  
387 investigation (see Discussion).

388

## 389 **Discussion**

390 Remarkably little is known about the relationship between spindle structure and  
391 contractile ring assembly and constriction during oocyte meiotic cell division. To gain  
392 insight into the cues that influence contractile ring dynamics during polar body extrusion,  
393 we have examined contractile ring assembly and constriction in three different *C.*  
394 *elegans* spindle assembly-defective mutants. Our results indicate that the *C. elegans*  
395 CLASP family member CLS-2 is required not only for assembly of a bipolar meiosis I  
396 spindle and for chromosome segregation, but also for an early stage in oocyte meiosis I

397 contractile ring assembly or stability. This requirement for CLS-2 is not due simply to a  
398 failure in assembling bipolar spindles or to a lack of chromosome segregation, because  
399 *klp-18/kinesin-12* mutant oocytes formed monopolar spindles and failed to segregate  
400 chromosomes but did assemble stable contractile rings that usually extruded  
401 chromosomes into a polar body. We have further shown that *mei-1/katanin* mutant  
402 oocytes, which assemble apolar and disorganized oocyte meiosis I spindles, also  
403 usually failed to extrude polar bodies. However, while CLS-2 was required early for  
404 contractile ring assembly or stability, MEI-1 appears to be required to limit the initial  
405 diameter of the contractile ring and for later steps in ring constriction. Finally, we also  
406 observed increased global cortical furrowing during meiosis I in *cls-2* mutant oocytes but  
407 not in *klp-18* or *mei-1* mutants, raising the possibility that proper regulation of cortical  
408 membrane ingressions throughout the oocyte may be required for contractile ring  
409 assembly or stability during polar body cytokinesis. Our results highlight the value of  
410 exploring the relationship between mutant oocyte meiotic spindle structures and polar  
411 body contractile ring dynamics.

412

### 413 **Using spindle assembly defective mutants to explore contractile ring dynamics** 414 **during oocyte polar body extrusion**

415 While the requirements for several factors that control oocyte meiotic spindle  
416 assembly in *C. elegans* have been described (1-3), the impact of the resulting spindle  
417 assembly defects on polar body extrusion has remained largely unexplored. Indeed,  
418 anecdotal observations have suggested that polar body extrusion can occur even in  
419 mutants with severe oocyte spindle assembly defects. For example, reducing the

420 function of the microtubule severing complex katanin, comprised of MEI-1 and -2 in *C.*  
421 *elegans*, results in severely defective apolar spindles that have greatly reduced levels of  
422 microtubules and fail to organize or segregate chromosomes and yet often produce  
423 abnormally large polar bodies. However, the dynamics of contractile ring assembly,  
424 ingression and constriction in *mei-1/katanin* mutants has not been directly examined.  
425 Similarly, mutant oocytes lacking the kinesin-12 family member KLP-18 assemble  
426 monopolar spindles that fail to segregate chromosomes but often produce zygotes that  
427 completely lack an egg pronucleus, indicating that all of the oocyte chromosomes are  
428 sometimes extruded into polar bodies, but again the process of polar body extrusion in  
429 *klp-18* mutants has not been directly examined. In mouse oocytes, DNA-coated beads  
430 have been shown to promote the assembly of a polar body-like cortical protrusion,  
431 which requires the small GTPase Ran that mediates chromatin signaling and, if allowed  
432 to assemble a bead-associated spindle structure, can lead to successful extrusion (18,  
433 19). However, knockdown of the *C. elegans* Ran family member RAN-1 does not  
434 prevent chromosome segregation or polar body extrusion (20, 21), suggesting that  
435 chromatin cues do not mediate contractile ring assembly. Moreover, meiotic spindles  
436 that fail to translocate to the oocyte cortex induce the formation of membrane furrows  
437 that ingress deeply toward the spindle (10), and *C. elegans* mutant oocytes lacking  
438 central spindle proteins have been shown to produce abnormally large contractile rings  
439 that often fail to extrude chromosomes into a polar body (10), suggesting that the oocyte  
440 meiotic spindle does influence ring assembly and function.

441         Given the critical roles of astral and central spindle microtubules in promoting the  
442 assembly of a contractile ring during mitosis (6-8), the distinct dynamics and geometry

443 of oocyte meiotic contractile rings compared to mitotic contractile rings (Fig 1A), and the  
444 indications that oocyte meiotic spindles influence contractile ring dynamics in *C.*  
445 *elegans*, we have characterized polar body extrusion in *C. elegans* mutants that are  
446 severely defective in oocyte spindle assembly. We were first motivated to do so based  
447 on our observation that *cls-2* oocytes frequently failed to extrude chromosomes, in  
448 contrast to anecdotal and indirect observations that other *C. elegans* mutants with  
449 severe oocyte meiotic spindle assembly defects can extrude chromosomes into polar  
450 bodies.

451         Because *cls-2* mutant oocytes failed to assemble bipolar spindles or segregate  
452 chromosomes, we also examined polar body extrusion in *klp-18/kinesin-12* mutant  
453 oocytes that assemble monopolar spindles and also fail to segregate chromosomes (34-  
454 36). In contrast to *cls-2* mutants, in which contractile ring assembly or stability and  
455 membrane ingression were severely defective, contractile ring assembly and ingression  
456 appeared much more normal in *klp-18* mutant oocytes and chromosomes were usually  
457 extruded into a polar body. We conclude that the defects in *cls-2* mutant oocytes are not  
458 due a failure to assemble a bipolar spindle or to segregate chromosomes, but rather  
459 reflect a more specific requirement for CLASP/CLS-2.

460         A specific requirement for CLS-2 is further supported by our analysis of oocyte  
461 meiotic contractile ring assembly and dynamics in *katanin/mei-1* oocytes, which  
462 assemble spindles that lack any polarity and completely fail to organize the dispersed  
463 oocyte chromosomes throughout meiosis I (34, 39, 40). Furthermore, similar to *cls-2*  
464 oocytes, microtubule levels are substantially reduced in *mei-1* mutant oocytes (47).  
465 Nevertheless, stable contractile rings usually formed in *mei-1* mutant oocytes, although

466 the rings appeared somewhat larger in diameter than in control oocytes, and we  
467 frequently observed extensive furrow ingressions that often enclosed the oocyte  
468 chromosomes but usually failed to complete constriction and regressed late in  
469 cytokinesis. We conclude that contractile rings can assemble and remain stable until  
470 late in polar body extrusion, even when oocyte meiotic spindle assembly is at least as  
471 severely defective as in *cls-2* mutant oocytes.

472

### 473 **Roles for CLS-2 and MEI-1 in contractile ring assembly and constriction.**

474 While our analysis indicates that CLS-2 is required early for the assembly or  
475 stability of the oocyte meiosis I contractile ring, we do not know if the defects reflect a  
476 direct or indirect requirement, or how CLS-2 functions at a molecular level to promote  
477 polar body extrusion. Consistent with studies showing that CLASP family members  
478 associate with microtubules and promote microtubule stability (22-25), *cls-2* mutant  
479 oocytes have reduced levels of spindle microtubules throughout meiosis I. Moreover,  
480 *cls-2* mutant oocytes fail to assemble bipolar spindles or segregate chromosomes, with  
481 ASPM-1 pole foci and chromosomes instead converging into a small amorphous  
482 cluster. While the contractile ring assembly defects we observed could be an indirect  
483 consequence of aberrant spindle assembly and structure, the more normal contractile  
484 ring dynamics observed in both *klp-18* and *mei-1* mutant oocytes suggest that CLS-2  
485 has a more specific role in mediating ring assembly or stability. Notably, human CLASP  
486 proteins have been shown to associate with actin filaments and may cross-link  
487 microtubules and filamentous actin (26). Furthermore, mutations in the *Drosophila* CLS-  
488 2 ortholog Orbit/Mast cause spermatocyte cytokinesis defects that appear to result from

489 a loss of central spindle microtubules that normally promote assembly of the contractile  
490 ring (48). Thus, it is possible that the contractile ring assembly or stability defects in *cls-*  
491 *2* mutants are due to a loss of microtubule and microfilament interactions that require  
492 CLS-2.

493 Consistent with a role for CLS-2 in bridging spindle microtubules and cortical  
494 actin filaments, we observed CLS-2::GFP throughout the oocyte spindles at the time  
495 when contractile ring assembly begins. However, at the time that ring assembly begins,  
496 very few spindle microtubules have been observed in close proximity to the cell cortex  
497 (49). Biochemical studies of CLS-2 and its potential interactions with microtubules and  
498 actin filaments, along with higher resolution imaging of CLS-2, spindle microtubules and  
499 cortical microfilaments in oocytes may improve our understanding of how CLS-2  
500 promotes the proper assembly and stability of the contractile ring during polar body  
501 extrusion.

502 Contractile ring dynamics during meiosis I were more normal after *mei-1* RNAi  
503 knockdown, but the furrows nevertheless often regressed and polar body extrusion  
504 usually failed. Previous studies have shown that partial loss of function mutations in  
505 *mei-1* result in abnormally large second polar bodies that are produced after meiosis II,  
506 as a result of decreased microtubule severing that is required for complete disassembly  
507 of the oocyte meiosis II spindle (42, 43). Our results provide the first systematic  
508 examination of polar body extrusion during meiosis I after depletion of katanin/MEI-1,  
509 and it is possible that the late failures in polar body cytokinesis that we observed also  
510 reflect a requirement for microtubule severing. Alternatively, similar defects are  
511 observed in oocytes lacking the centralspindlin components CYK-4 and ZEN-4 (10, 14,

512 27, 45), and it is possible that central spindle proteins are mis-regulated after MEI-1  
513 knockdown. Further investigation of MEI-1 and its interactions with central spindle  
514 proteins may improve our understanding of this late requirement for MEI-1 during polar  
515 body extrusion.

516

### 517 **Negative regulation of oocyte global cortical dynamics and its relationship to** 518 **polar body extrusion**

519 In addition to the defects in contractile ring dynamics during polar body extrusion  
520 in *cls-2* mutant oocytes, we also observed increased membrane ingressions throughout  
521 the oocyte cortex. Furthermore, we detected CLS-2::GFP in small patches throughout  
522 the cortex in control oocytes. These patches were present early in meiosis I but  
523 dissipated before anaphase chromosome segregation, prior to initiation of the  
524 membrane ingressions that occur during anaphase in wild-type oocytes. While the  
525 excessive global furrowing in *cls-2* mutants may result from loss of the cortical CLS-2  
526 patches, if so then CLS-2 may act prior to the initiation of global cortical furrowing to  
527 down-regulate the ingressions. Alternatively, low levels of cortical CLS-2 that were not  
528 detected with our imaging methods might contribute to this negative regulation of  
529 membrane furrowing throughout the oocyte cortex.

530 The molecular mechanism by which cortical CLS-2 patches might down-regulate  
531 global membrane ingression during oocyte meiosis I is not clear. Our observations that  
532 NMY-2 and ANI-1 dynamics were not altered in *cls-2* oocytes suggests that the  
533 increased membrane ingression is not be due to an increase in cortical actomyosin  
534 contractility but perhaps is an indirect consequence of defects in the stiffness of the



535 oocyte cortex. The observations that CLASP orthologs can interact with both cortical  
536 microtubules and actin filaments may be consistent with such a role for CLS-2 (26).  
537 Moreover, oocyte polar body extrusion has been described as a bleb-like process, with  
538 local weakening of the actomyosin cytoskeleton inside the contractile ring promoting an  
539 out-pocketing of the membrane to form a polar body (5, 10). Studies of bleb formation in  
540 other cellular contexts have shown that microtubule destabilization can result in bleb  
541 formation (50-52). Thus, it is possible that loss of CLS-2 promotes membrane  
542 ingressions throughout the cortex due to destabilization of cortical microtubules and a  
543 corresponding decrease in cortical stiffness, although we have not yet detected  
544 statistically significant differences in the levels of cortical microtubules in *c/s-2* oocytes  
545 (data not shown). Alternatively, mammalian CLASPs mediate linkage between  
546 microtubule plus ends and the cell cortex (53, 54), and such interactions might also  
547 influence cortical stiffness in *C. elegans* oocytes. Other factors, including the kinesin-13  
548 family member KLP-7 and the TOG domain protein and XMAP215 ortholog ZYG-9,  
549 have been shown to down-regulate cortical microtubule levels during oocyte meiotic cell  
550 division in *C. elegans* (21, 55). Further investigation both of microtubule and actomyosin  
551 dynamics, using higher resolution light microscopy methods, and studies of how  
552 microfilament and microtubule regulators interact to influence oocyte cortical dynamics,  
553 may improve our understanding of how global cortical contractility and membrane  
554 dynamics influence contractile ring dynamics during polar body extrusion.

555           Comparing the consequences of reducing the functions of the casein kinase  
556 CNSK-1 and CLS-2 indicates that the relationship between global cortical dynamics and  
557 polar body extrusion is complex. CSNK-1 also limits membrane ingressions throughout

558 the oocyte cortex during meiosis I but appears to do so through negative regulation of  
559 actomyosin dynamics, and CSNK-1 knockdown often results in extrusion of the entire  
560 meiotic spindle and all of the oocyte chromosomes into the first polar body (15). This  
561 outcome has led to a model in which global cortical contraction generates a hydrostatic  
562 cytoplasmic force that promotes an out-pocketing of the plasma membrane as the  
563 spindle is pushed through the contractile ring and into the forming polar body. While  
564 such a mechanism may operate, it also is clear that the contractile ring and associated  
565 plasma membrane ingress substantially prior to constricting roughly midway along the  
566 axis of the spindle during polar body extrusion. These dynamics suggest that the  
567 spindle and the contractile ring interact to promote furrow ingression and constriction.  
568 Moreover, the increased global membrane ingressions in *cls-2* oocytes do not appear to  
569 result from increased actomyosin contractility and are accompanied by defects in ring  
570 assembly or stability and a frequent failure to extrude a polar body. Thus, it appears that  
571 negative regulation of global cortical membrane ingression during oocyte meiotic cell  
572 division can both promote and prevent the extrusion of chromosomes into polar bodies.  
573 These different outcomes presumably reflect differences in how CSNK-1 and CLS-2  
574 influence the cortical cytoskeleton and its dynamics. One possible explanation for these  
575 different outcomes is that a loss of cortical stiffness in *cls-2* oocytes might allow for  
576 increased membrane ingression throughout the oocyte cortex, while at the same time  
577 disrupting contractile ring assembly and/or preventing any increase in the hydrostatic  
578 cytoplasmic force that has been proposed to push the meiotic spindle partly into the  
579 budding polar body (15). Further investigation of cortical cytoskeleton dynamics, and the  
580 interactions of factors that regulate these dynamics during polar body extrusion, should

581 improve our understanding of this poorly understood but fundamentally important  
582 biological process.

583 **Materials and methods**

584 ***C. elegans* Strain Maintenance**

585 All *C. elegans* strains used in this study (S1 Table), were maintained at 20°C as  
586 described previously (56).

587

588 ***cls-2* CRISPR/Cas9 Allele Generation**

589 Mutations in *cls-2* were generated by injecting young adult N2 hermaphrodites with the  
590 following mixture (57): 25µM *cls-2* crRNA (ATCAGCCGATCGACTCCGGG), 5µM *dpy-10*  
591 crRNA (GCTACCATAGGCACCAC GAG), 30µM trRNA, 2.1µg/µl Cas9-NLS, and  
592 2.5µM *dpy-10* single-strand DNA (ssDNA,

593 CACTTGAAGTTCAATACGGCAAGATGAGAATGACTGGAAACCGTACCGCATGCGG

594 TGCCTATGGTAGCGGAGCTTCACATGGCTTCAGACCAACAGCCTAT). No

595 homologous repair template was used for *cls-2*, and *cls-2* DNA breaks were allowed to

596 repair randomly. Before injection, the trRNA and crRNAs were mixed and incubated at

597 95°C for 5 minutes, before cooling at room temperature for 5 minutes. After cooling,

598 Cas9-NLS (QB3-Berkeley MacroLab) was added to the annealed trRNA and crRNAs

599 and allowed to incubate for another 5 minutes at room temperature before the *dpy-10*

600 ssDNA repair template was added. After injection, hermaphrodites were singled out and

601 their broods were screened for *dpy-10* roller or dumpy co-conversion worms, which

602 were allowed to produce broods. Those broods were then evaluated for potential *cls-2*

603 phenotypes (embryonic lethality), and lines identified as potentially carrying mutations to

604 *cls-2* were balanced. PCR amplified fragments were Sanger sequenced to identify the

605 CRISPR/Cas9-induced mutations.

606

### 607 **Feeding RNAi Knockdown of *mei-1* and *klp-18***

608 RNAi knockdown of *mei-1* and *klp-18* was achieved by plating hypochlorite  
609 synchronized L1 larvae onto *E. coli* (HT115) lawns induced to express dsRNA  
610 corresponding to *mei-1* or *klp-18* (58). Plated worms were either maintained at 20°C  
611 until adults were imaged (*mei-1*) or maintained at 20°C and upshifted to 26°C 16 hours  
612 prior to imaging (*klp-18*) to ensure robust knockdown, as determined by the formation of  
613 monopolar meiotic spindles in both meiosis I and II. The *mei-1* RNAi vector was from  
614 the Ahringer RNAi library (59). The *klp-18* RNAi vector was made by amplifying a  
615 portion of the *klp-18* coding sequence from isolated N2 genomic DNA (using primers 5'-  
616 ACCGGCAGATCTGATATCATCGATGAATTCTCCAACCTTTCAA ATGCCACA-3' and 5'-  
617 ACGGTATCGATAAGCTTGATATCGAATTCCTTCGATATGGAA GAA AGCGG-3'),  
618 which was inserted into the L4440 vector backbone using the NEBuilder HiFi DNA  
619 assembly cloning kit (NEB).

620

### 621 **Live-cell Imaging**

622 All imaging was carried out using a Leica DMI8 microscope outfitted with a spinning disk  
623 confocal unit – CSU-W1 (Yokogawa) with Borealis (Andor), dual iXon Ultra 897 (Andor)  
624 cameras, and a 100x HCX PL APO 1.4-0.70NA oil objective lens (Leica). Metamorph  
625 (Molecular Devices) imaging software was used for controlling image acquisition. The  
626 488nm and 561nm channels were imaged simultaneously every 10 seconds with 1µm  
627 Z-spacing (either 16µm or 21µm total Z-stacks depending on the fluorescent markers

628 used, with the same stack size used for all movies utilizing the same fluorescent  
629 markers).

630 *In utero* live imaging of oocytes was accomplished by mounting adult worms with  
631 a single row or less of embryos in 1.5 $\mu$ l of M9 mixed with 1.5 $\mu$ l of 0.1 $\mu$ m polystyrene  
632 Microspheres (Polysciences Inc.) on a 6% agarose pad with a coverslip gently laid over  
633 top. *Ex utero* imaging of oocytes was carried out by cutting open adult worms with a  
634 single row or less of embryos in 4 $\mu$ l of egg buffer (118mM NaCl, 48mM KCl, 2mM  
635 CaCl<sub>2</sub>, 2mM MgCl<sub>2</sub>, and 0.025 mM of HEPES, filter sterilized before HEPES addition)  
636 on a coverslip before mounting onto a 2% agarose pad on a microscope slide.

637

### 638 **Image analysis, Quantification, and Statistical Analysis**

639 General image analysis and quantification of microtubules and global cortical furrowing  
640 was carried out using FIJI software (60). Three-dimensional projection and rotation of  
641 movies used to look at polar body contractile rings was carried out using Imaris software  
642 (Bitplane). Meiosis I polar body extrusion success was evaluated based on whether  
643 oocytes extruded any chromosomes marked by GFP or mCherry histone 2B (H2B) into  
644 a polar body that remained extruded for the period of imaging, either until meiosis I had  
645 obviously ended and meiosis II spindle assembly began, or until pronuclei began to  
646 decondense in the one-cell stage embryo after meiosis II. The end of meiosis I and  
647 beginning of meiosis II was considered to be the time at which the chromosomes left in  
648 the oocyte cytoplasm began to visibly separate from each other. Projections for spindle-  
649 associated furrow examination were made by manually isolating the 5 most spindle-  
650 associated z-planes for each time point during the period of global cortical furrowing and

651 then sum projecting the mCherry::PH membrane signal. Membrane temporal overlays  
652 were created by overlaying the outlined membrane regions of interest for the period of  
653 furrowing (detailed below) to create a single image.

654 Total spindle microtubule pixel intensity was determined using the following  
655 formula: (Mean Grey Value (spindle)/Mean Grey Value (cytoplasm)) × spindle area =  
656 total spindle microtubule pixel intensity. The mean grey values for both the meiotic  
657 spindle and cytoplasm were determined by drawing a region of interest around either  
658 the meiotic spindle or a portion of oocyte cytoplasm devoid of adjacent sperm in  
659 maximum projected Z-stacks and measuring the mean grey value of the selected region  
660 in ImageJ. Spindle area was determined by measuring the area of the region of interest  
661 encompassing the meiotic spindle.

662 Quantification of global cortical furrowing was accomplished by drawing regions  
663 of interest over the oocyte membrane signal (mCherry::PH) for a single central z-slice  
664 for the entire period of global cortical furrowing. Regions of interest were then converted  
665 to a high contrast stack of membrane positions over time, which were then analyzed  
666 using the ADAPT plugin (61) for ImageJ in order to determine curvature values across  
667 the oocyte membrane. A furrow was defined as being at least two consecutive  
668 membrane points with negative mean curvature values and a standard deviation of  
669 mean curvature at least two standard deviations above the average standard deviation  
670 of mean curvature value for the entire oocyte membrane. Membrane points fitting the  
671 criteria of a furrow (above) that were separated by a single membrane point not fitting  
672 the criteria were considered as part of the same furrow for the purposes of counting. For  
673 statistical analysis of global cortical furrowing (Fig 7B), one-way ANOVA was used to

674 determine if there was any difference in the mean furrowing between genotypes, F-  
675 Tests to compare the variances, and two-tailed Student's t-Tests between genotypes to  
676 compare the means directly (assuming either equal or unequal variances depending on  
677 the F-Test results). Statistical analysis and graphs were completed using Excel  
678 (Microsoft).

679

### 680 **Acknowledgements**

681 We thank Julien Dumont, Amy Maddox, and the Caenorhabditis Genetics Center  
682 (funded by the NIH Office of Research Infrastructure Programs; P40 OD010440) for *C.*  
683 *elegans* strains, Jie Yang for the KLP-18 RNAi vector, Chris Doe and Diana Libuda for  
684 sharing laboratory equipment, and members of the Bowerman laboratory for helpful  
685 discussions.

686

### 687 **Figure Legends**

688 **Fig 1 – Schematics of oocyte meiotic polar body extrusion, mitotic cytokinesis**  
689 **and oocyte meiotic spindle assembly-defective mutants.** (A) The positioning and  
690 dynamics of contractile ring assembly and ingression during oocyte polar body extrusion  
691 and mitotic cytokinesis. (B) Illustrations of oocyte meiotic spindle structure in control and  
692 mutant oocytes. Green = microtubules, blue = chromosomes, magenta = contractile  
693 rings, and orange = ASPM-1 pole marker, black = plasma membrane. See text for  
694 details.

695



696 **Fig 2 – CLS-2 is required for oocyte meiotic spindle assembly and polar body**  
697 **extrusion.** (A) Control oocytes expressing CLS-2::GFP and mCherry:H2B during  
698 meiosis I; dashed boxes indicate the zoomed-in regions shown in top row. (B) Protein  
699 domain map for wild type CLS-2 (28), and location of first premature stop codon due to  
700 frameshift in *cls-2(or1948)*. (C) Table of embryonic viability in wild type (N2) and *cls-2*  
701 CRISPR-generated loss of function alleles. (D) Control and mutant oocytes expressing  
702 GFP::Tubulin and mCherry::H2B during meiosis I; t = 0 seconds (0s) corresponds to the  
703 end of meiosis I and beginning of meiosis II (see Materials and methods). (E)  
704 Comparison of integrated spindle microtubule pixel intensity over time between control  
705 (n = 17) and *cls-2* mutant oocytes (n = 9 @ -340s, n = 10 @ -330 to -300s, n = 11 @ -  
706 290 to -160s, and n = 12 @ -150 to 0s), with the average intensity indicated and one  
707 standard deviation indicated. Here and in subsequent figure panels, T = 0s corresponds  
708 to the end of meiosis I and beginning of meiosis II, unless indicated otherwise (see  
709 Materials and methods). (F) Control and mutant oocytes expressing GFP::ASPM-1 and  
710 mCherry::H2B during meiosis I. (G) Percent of control and mutant oocytes that extrude  
711 a polar body during meiosis I, as determined by mCherry or GFP-fused histone signal  
712 remaining stably ejected from the oocyte cytoplasm for the duration of imaging (see  
713 Materials and methods).

714

715 **Fig 3 – Central spindle proteins AIR-2 and CYK-4 still associate with spindle**  
716 **microtubules in *cls-2* mutant oocytes.** Control and *cls-2* mutant oocytes expressing  
717 GFP::AIR-2 and mCherry::H2B (A) or GFP::CYK-4 and mCherry::H2B (B) during  
718 meiosis I.

719

720 **Fig 4 – Spindle-associated membrane furrowing during meiosis I in control and**

721 **mutant oocytes.** Images show projections of five focal planes encompassing the

722 chromosomes during meiosis I in oocytes expressing an mCherry fusion to a PH

723 domain to mark the plasma membrane using sum projections and GFP::H2B using

724 maximum projections. Representative examples of control (A, B), *cls-2* mutant (C-E),

725 *klp-18(RNAi)* (F, G) and *mei-1(RNAi)* (H, I) oocytes. Polar body extrusion failed in C-E

726 and H, and was successful in all others. T = 0s corresponds to the timepoint

727 immediately before cortical furrowing begins. See text for details.

728

729 **Fig 5 – Contractile ring non-muscle myosin NMY-2 dynamics during meiosis I in**

730 **control and mutant oocytes.** Three-dimensionally projected and rotated images of

731 control (A), *cls-2* mutant (B), *klp-18(RNAi)* (C), and *mei-1(RNAi)* (D) oocytes expressing

732 NMY-2::GFP and mCherry::H2B. Z-stacks were rotated as to look down on contractile

733 ring assembly and dynamics over time.

734

735 **Fig 6 – Contractile ring anillin ANI-1 and non-muscle myosin NMY-2 dynamics**

736 **during meiosis I in control and *cls-2* mutant oocytes.** Three-dimensionally projected

737 and rotated images of control and *cls-2* mutant oocytes expressing mNeonGreen::ANI-1

738 and mCherry::H2B (A) or NMY-2::mKate2, mNeonGreen::ANI-1, and mCherry::H2B,

739 with overlays shown in top row for each set. Z-stacks were rotated so as to look down

740 on contractile ring assembly and dynamics over time.

741

742 **Fig 7 – Membrane ingressions throughout the oocyte cortex during meiosis I in**  
743 **control and mutant oocytes.** (A) Membrane temporal overlays for control, *cls-2*  
744 mutant, *klp-18(RNAi)*, and *mei-1(RNAi)* oocytes representing the membrane positions of  
745 a single focal plane during the period of meiosis I global cortical furrowing for a single  
746 oocyte of each genotype. (B) Quantification of the number of global cortical furrows in  
747 control and mutant oocytes (see Materials and methods). t-Test results: Control vs *cls-*  
748 *2(or1948)*  $p = 0.0014$  (\*\*), *cls-2(or1948)* vs *klp-18(RNAi)*  $p = 3.14E-5$  (\*\*\*), *cls-2(or1948)*  
749 vs *mei-1(RNAi)*  $p = 0.054$  (ns). (C and D) Control and *cls-2* mutant oocytes expressing  
750 (C) NMY-2::GFP and mCherry::H2B or (D) mNeonGreen::ANI-1 and mCherry::H2B.  
751

752 **S1 Fig - CLS-2 localizes to meiotic spindles and is required for their assembly**  
753 (A) *In utero* time-lapse spinning disk confocal images of CLS-2::GFP and  
754 mCherry::H2B. (B) Protein domain maps of wild type CLS-2 and CRISPR-generated  
755 *cls-2* alleles *or1949*, *or1950*, and *or1951*. Each mutation results in multiple early stop  
756 codons before the first TOG domain, with the first stop codon indicated. (C) *In utero*  
757 time-lapse spinning disk confocal images of control and *cls-2* mutant oocytes with  
758 GFP::TBB-2 and mCherry::H2B.  $t = 0$  seconds corresponds to nuclear envelope  
759 breakdown.  
760

761 **S2 Fig - Control oocyte spindle-associated membrane furrows**  
762 Time-lapse spinning disk confocal images of control oocytes expressing mCherry::PH  
763 and GFP::H2B;  $t = 0$  seconds here and in subsequent Fig 4 related supplements (S3-6

764 Figs) corresponds to the time point immediately before global cortical furrowing begins,  
765 unless otherwise stated.

766

767 **S3 Fig - *cls-2(or1948)* oocyte spindle-associated membrane furrows**

768 Time-lapse spinning disk confocal images of *cls-2* mutant oocytes expressing  
769 mCherry::PH and GFP::H2B.

770

771 **S4 Fig - *cls-2(or1948)* oocyte spindle-associated membrane furrows**

772 Time-lapse spinning disk confocal images of *cls-2* mutant oocytes expressing  
773 mCherry::PH and GFP::H2B.

774

775 **S5 Fig – *klp-18(RNAi)* oocyte spindle-associated membrane furrows**

776 Time-lapse spinning disk confocal images of *klp-18(RNAi)* oocytes expressing  
777 mCherry::PH and GFP::H2B.

778

779 **S6 Fig – *mei-1(RNAi)* oocyte spindle-associated membrane furrows**

780 Time-lapse spinning disk confocal images of *mei-1(RNAi)* oocytes expressing  
781 mCherry::PH and GFP::H2B.

782

783 **S7 Fig – Control oocyte NMY-2::GFP contractile rings**

784 Three-dimensionally projected and rotated spinning disk confocal time-lapse images of  
785 control oocytes expressing NMY-2::GFP and mCherry::H2B; t = 0 seconds in this and

786 subsequent Fig 5 related supplements (S8-10 Figs) corresponds to the end of meiosis I  
787 and beginning of meiosis II (see Materials and methods).

788

789 **S8 Fig – *cls-2(or1948)* oocyte NMY-2::GFP contractile rings**

790 Three-dimensionally projected and rotated spinning disk confocal time-lapse images of  
791 *cls-2* mutant oocytes expressing NMY-2::GFP and mCherry::H2B.

792

793 **S9 Fig – *klp-18(RNAi)* oocyte NMY-2::GFP contractile rings**

794 Three-dimensionally projected and rotated spinning disk confocal time-lapse images of  
795 *klp-18(RNAi)* oocytes expressing NMY-2::GFP and mCherry::H2B.

796

797 **S10 Fig – *mei-1(RNAi)* oocyte NMY-2::GFP contractile rings**

798 Three-dimensionally projected and rotated spinning disk confocal time-lapse images of  
799 *mei-1(RNAi)* oocytes expressing NMY-2::GFP and mCherry::H2B.

800

801 **S11 Fig – Control oocyte membrane temporal overlays**

802 Control oocyte membrane temporal overlays depicting membrane positions over time at  
803 a single focal plane throughout meiosis I.

804

805 **S12 Fig – *cls-2(or1948)* oocyte membrane temporal overlays**

806 *cls-2* mutant oocyte membrane temporal overlays depicting membrane positions over  
807 time at a single focal plane throughout meiosis I. Asterisks indicate oocytes in which  
808 polar body extrusion failed.

809

810 **S13 Fig – *klp-18(RNAi)* and *mei-1(RNAi)* membrane temporal overlays**

811 *klp-18(RNAi)* and *mei-1(RNAi)* oocyte membrane temporal overlays depicting  
812 membrane positions over time at a single focal plane throughout meiosis I. Asterisks  
813 indicate oocytes in which polar body extrusion failed.

814

815 **S14 Fig – Control oocyte NMY-2::GFP cortical dynamics**

816 Time-lapse spinning disk confocal images of control oocytes expressing NMY-2::GFP  
817 and mCherry:H2B; t = 0 seconds corresponds to the end of meiosis I and beginning of  
818 meiosis II in this and subsequent Fig 7 related supplements (S15-18 Figs).

819

820 **S15 Fig – Control oocyte mNG::ANI-1 cortical dynamics**

821 Time-lapse spinning disk confocal images of control oocytes expressing  
822 mNeonGreen::ANI-1 and mCherry::H2B.

823

824 **S16 Fig – *cls-2(or1948)* oocyte NMY-2::GFP cortical dynamics**

825 Time-lapse spinning disk confocal images of *cls-2* mutant oocytes expressing NMY-  
826 2::GFP and mCherry::H2B. All oocytes shown succeeded in polar body extrusion.

827

828 **S17 Fig – *cls-2(or1948)* oocyte NMY-2::GFP cortical dynamics**

829 Time-lapse spinning disk confocal images of *cls-2* mutant oocytes expressing NMY-  
830 2::GFP and mCherry::H2B. All oocytes shown failed in polar body extrusion.

831

832 **S18 Fig – *cls-2(or1948)* oocyte mNG::ANI-1 cortical dynamics**

833 Time-lapse spinning disk confocal images of *cls-2* mutant oocytes expressing  
834 mNeonGreen::ANI-1 and mCherry::H2B; t = 0s corresponds to the end of meiosis I and  
835 beginning of meiosis II. All oocytes shown failed in polar body extrusion.

836

837 **S1 Movie – *Ex utero* CLS-2::GFP localization**

838 *Ex utero* time-lapse spinning disk confocal movie of a maximum projected oocyte  
839 expressing CLS-2::GFP (green) and mCherry::H2B (magenta). Frame rate is 10 frames  
840 per second.

841

842 **S2 Movie – *In utero* CLS-2::GFP localization**

843 *In utero* time-lapse spinning disk confocal movie of a maximum projected oocyte  
844 expressing CLS-2::GFP (green) and mCherry::H2B (magenta). Frame rate is 10 frames  
845 per second.

846

847 **S3 Movie – Control oocyte membrane furrowing**

848 *Ex utero* time-lapse spinning disk confocal movie of a control oocyte expressing  
849 mCherry::PH (black) and GFP::H2B (magenta). In this and subsequent oocyte  
850 membrane furrowing videos, the 5 focal planes that encompassed most of the meiotic  
851 chromosomes were used; membrane images were sum projected, histones images  
852 were maximum projected. In this and all subsequent Fig 4 related movies (S4-10  
853 Movies), the frame rate is 5 frames per second.

854

855 **S4 Movie – Control oocyte membrane furrowing**

856 *Ex utero* time-lapse spinning disk confocal movie of a control oocyte expressing

857 mCherry::PH (black) and GFP::H2B (magenta).

858

859 **S5 Movie – *cls-2(or1948)* oocyte membrane furrowing**

860 *Ex utero* time-lapse spinning disk confocal movie of a *cls-2(or1948)* oocyte expressing

861 mCherry::PH (black) and GFP::H2B (magenta).

862

863 **S6 Movie – *cls-2(or1948)* oocyte membrane furrowing**

864 *Ex utero* time-lapse spinning disk confocal movie of a *cls-2(or1948)* oocyte expressing

865 mCherry::PH (black) and GFP::H2B (magenta).

866

867 **S7 Movie – *klp-18(RNAi)* oocyte membrane furrowing**

868 *Ex utero* time-lapse spinning disk confocal movie of a *klp-18(RNAi)* oocyte expressing

869 mCherry::PH (black) and GFP::H2B (magenta).

870

871 **S8 Movie – *klp-18(RNAi)* oocyte membrane furrowing**

872 *Ex utero* time-lapse spinning disk confocal movie of a *klp-18(RNAi)* oocyte expressing

873 mCherry::PH (black) and GFP::H2B (magenta).

874

875 **S9 Movie – *mei-1(RNAi)* oocyte membrane furrowing**

876 *Ex utero* time-lapse spinning disk confocal movie of a *mei-1(RNAi)* oocyte expressing

877 mCherry::PH (black) and GFP::H2B (magenta).



878

879 **S10 Movie – *mei-1(RNAi)* oocyte membrane furrowing**

880 *Ex utero* time-lapse spinning disk confocal movie of a *mei-1(RNAi)* oocyte expressing  
881 mCherry::PH (black) and GFP::H2B (magenta).

882

883 **S11 Movie – Control oocyte NMY-2::GFP contractile ring dynamics**

884 *Ex utero* 3-dimensionally projected and rotated time-lapse spinning disk confocal movie  
885 of control oocyte expressing NMY-2::GFP (green) and mCherry:H2B (magenta). In this  
886 and all subsequent Fig 5 related movies (S12-18 Movies), the frame rate is 5 frames per  
887 second.

888

889 **S12 Movie – Control oocyte NMY-2::GFP contractile ring dynamics**

890 *Ex utero* 3-dimensionally projected and rotated time-lapse spinning disk confocal movie  
891 of control oocyte expressing NMY-2::GFP (green) and mCherry:H2B (magenta).

892

893 **S13 Movie – *cls-2(or1948)* oocyte NMY-2::GFP contractile ring dynamics**

894 *Ex utero* 3-dimensionally projected and rotated time-lapse spinning disk confocal movie  
895 of *cls-2(or1948)* oocyte expressing NMY-2::GFP (green) and mCherry:H2B (magenta).

896

897 **S14 Movie – *cls-2(or1948)* oocyte NMY-2::GFP contractile ring dynamics**

898 *Ex utero* 3-dimensionally projected and rotated time-lapse spinning disk confocal movie  
899 of *cls-2(or1948)* oocyte expressing NMY-2::GFP (green) and mCherry:H2B (magenta).

900

901 **S15 Movie – *klp-18(RNAi)* oocyte NMY-2::GFP contractile ring dynamics**

902 *Ex utero* 3-dimensionally projected and rotated time-lapse spinning disk confocal movie  
903 of *klp-18(RNAi)* oocyte expressing NMY-2::GFP (green) and mCherry:H2B (magenta).

904

905 **S16 Movie – *klp-18(RNAi)* oocyte NMY-2::GFP contractile ring dynamics**

906 *Ex utero* 3-dimensionally projected and rotated time-lapse spinning disk confocal movie  
907 of *klp-18(RNAi)* oocyte expressing NMY-2::GFP (green) and mCherry:H2B (magenta).

908

909 **S17 Movie – *mei-1(RNAi)* oocyte NMY-2::GFP contractile ring dynamics**

910 *Ex utero* 3-dimensionally projected and rotated time-lapse spinning disk confocal movie  
911 of *mei-1(RNAi)* oocyte expressing NMY-2::GFP (green) and mCherry:H2B (magenta).

912

913 **S18 Movie – *mei-1(RNAi)* oocyte NMY-2::GFP contractile ring dynamics**

914 *Ex utero* 3-dimensionally projected and rotated time-lapse spinning disk confocal movie  
915 of *mei-1(RNAi)* oocyte expressing NMY-2::GFP (green) and mCherry:H2B (magenta).

916

917 **S19 Movie – Control oocyte mNG::ANI-1 contractile ring dynamics**

918 *Ex utero* 3-dimensionally projected and rotated time-lapse spinning disk confocal movie  
919 of control oocyte expressing mNG::ANI-1 (green) and mCherry:H2B (magenta). In this  
920 and all subsequent Fig 6 related movies (S20-22 Movies), the frame rate is 5 frames per  
921 second.

922

923 **S20 Movie – *cls-2(or1948)* oocyte mNG::ANI-1 contractile ring dynamics**

924 *Ex utero* 3-dimensionally projected and rotated time-lapse spinning disk confocal movie  
925 of *cls-2(or1948)* oocyte expressing mNG::ANI-1 (green) and mCherry:H2B (magenta).

926

927 **S21 Movie – Control oocyte NMY-2::mKate2 and mNG::ANI-1 contractile ring**  
928 **dynamics**

929 *Ex utero* 3-dimensionally projected and rotated time-lapse spinning disk confocal movie  
930 of control oocyte expressing NMY-2::mKate2 (magenta), mNG::ANI-1 (green), and  
931 mCherry:H2B (magenta).

932

933 **S22 Movie – *cls-2(or1948)* oocyte NMY-2::mKate2 and mNG::ANI-1 contractile ring**  
934 **dynamics**

935 *Ex utero* 3-dimensionally projected and rotated time-lapse spinning disk confocal movie  
936 of *cls-2(or1948)* oocyte expressing NMY-2::mKate2 (magenta), mNG::ANI-1 (green),  
937 and mCherry:H2B (magenta).

938

939 **S23 Movie – Control oocyte NMY-2::GFP cortical dynamics**

940 Three example time-lapse spinning disk confocal movies of *ex utero* control oocytes  
941 expressing NMY-2::GFP (green) and mCherry::H2B (magenta). In this and all  
942 subsequent Fig 7 related movies (S24-26 Movies), the frame rate is 5 frames per  
943 second.

944

945 **S24 Movie – *cls-2(or1948)* oocyte NMY-2::GFP cortical dynamics**

946 Three example time-lapse spinning disk confocal movies of *ex utero cls-2(or1948)*  
947 oocytes expressing NMY-2::GFP (green) and mCherry::H2B (magenta).

948

949 **S25 Movie – Control oocyte mNG::ANI-1 cortical dynamics**

950 Three example time-lapse spinning disk confocal movies of *ex utero* control oocytes  
951 expressing mNG::ANI-1 (green) and mCherry::H2B (magenta).

952

953 **S26 Movie – *cls-2(or1948)* oocyte mNG::ANI-1 cortical dynamics**

954 Three example time-lapse spinning disk confocal movies of *ex utero cls-2(or1948)*  
955 oocytes expressing mNG::ANI-1 (green) and mCherry::H2B (magenta).

956

957 **S1 Table – Table of *C. elegans* strains used in this study**

958

959 **References**

- 960
- 961 1. Dumont J, Desai A. Acentrosomal spindle assembly and chromosome  
962 segregation during oocyte meiosis. *Trends Cell Biol.* 2012;22(5):241-9.
- 963 2. Severson AF, von Dassow G, Bowerman B. Oocyte Meiotic Spindle Assembly  
964 and Function. *Curr Top Dev Biol.* 2016;116:65-98.
- 965 3. Mullen TJ, Davis-Roca AC, Wignall SM. Spindle assembly and chromosome  
966 dynamics during oocyte meiosis. *Curr Opin Cell Biol.* 2019;60:53-9.
- 967 4. Ohkura H. Meiosis: an overview of key differences from mitosis. *Cold Spring  
968 Harb Perspect Biol.* 2015;7(5).
- 969 5. Maddox AS, Azoury J, Dumont J. Polar body cytokinesis. *Cytoskeleton  
970 (Hoboken).* 2012;69(11):855-68.
- 971 6. Pintard L, Bowerman B. Mitotic Cell Division in *Caenorhabditis elegans*.  
972 *Genetics.* 2019;211(1):35-73.
- 973 7. Green RA, Paluch E, Oegema K. Cytokinesis in animal cells. *Annu Rev Cell Dev  
974 Biol.* 2012;28:29-58.
- 975 8. Basant A, Glotzer M. Spatiotemporal Regulation of RhoA during Cytokinesis.  
976 *Curr Biol.* 2018;28(9):R570-R80.
- 977 9. Shelton CA, Carter JC, Ellis GC, Bowerman B. The nonmuscle myosin regulatory  
978 light chain gene *mlc-4* is required for cytokinesis, anterior-posterior polarity, and body  
979 morphology during *Caenorhabditis elegans* embryogenesis. *J Cell Biol.*  
980 1999;146(2):439-51.
- 981 10. Fabritius AS, Flynn JR, McNally FJ. Initial diameter of the polar body contractile  
982 ring is minimized by the centralspindlin complex. *Dev Biol.* 2011;359(1):137-48.
- 983 11. Swan KA, Severson AF, Carter JC, Martin PR, Schnabel H, Schnabel R, et al.  
984 *cyk-1*: a *C. elegans* FH gene required for a late step in embryonic cytokinesis. *J Cell  
985 Sci.* 1998;111 ( Pt 14):2017-27.
- 986 12. Dorn JF, Zhang L, Paradis V, Edoh-Bedi D, Jusu S, Maddox PS, et al.  
987 Actomyosin tube formation in polar body cytokinesis requires Anillin in *C. elegans*. *Curr  
988 Biol.* 2010;20(22):2046-51.

- 989 13. Schonegg S, Hyman AA. CDC-42 and RHO-1 coordinate actomyosin  
990 contractility and PAR protein localization during polarity establishment in *C. elegans*  
991 embryos. *Development*. 2006;133(18):3507-16.
- 992 14. Schumacher JM, Golden A, Donovan PJ. AIR-2: An Aurora/Ipl1-related protein  
993 kinase associated with chromosomes and midbody microtubules is required for polar  
994 body extrusion and cytokinesis in *Caenorhabditis elegans* embryos. *J Cell Biol*.  
995 1998;143(6):1635-46.
- 996 15. Flynn JR, McNally FJ. A casein kinase 1 prevents expulsion of the oocyte meiotic  
997 spindle into a polar body by regulating cortical contractility. *Mol Biol Cell*.  
998 2017;28(18):2410-9.
- 999 16. Clandinin TR, Mains PE. Genetic studies of mei-1 gene activity during the  
1000 transition from meiosis to mitosis in *Caenorhabditis elegans*. *Genetics*.  
1001 1993;134(1):199-210.
- 1002 17. Mains PE, Kemphues KJ, Sprunger SA, Sulston IA, Wood WB. Mutations  
1003 affecting the meiotic and mitotic divisions of the early *Caenorhabditis elegans* embryo.  
1004 *Genetics*. 1990;126(3):593-605.
- 1005 18. Deng M, Li R. Sperm chromatin-induced ectopic polar body extrusion in mouse  
1006 eggs after ICSI and delayed egg activation. *PLoS One*. 2009;4(9):e7171.
- 1007 19. Deng M, Suraneni P, Schultz RM, Li R. The Ran GTPase mediates chromatin  
1008 signaling to control cortical polarity during polar body extrusion in mouse oocytes. *Dev*  
1009 *Cell*. 2007;12(2):301-8.
- 1010 20. Askjaer P, Galy V, Hannak E, Mattaj JW. Ran GTPase cycle and importins alpha  
1011 and beta are essential for spindle formation and nuclear envelope assembly in living  
1012 *Caenorhabditis elegans* embryos. *Mol Biol Cell*. 2002;13(12):4355-70.
- 1013 21. Chuang C-H, Schlientz AJ, Yang J, Bowerman B. Microtubule Assembly and  
1014 Pole Coalescence: Early Steps in *C. elegans* Oocyte Meiosis I Spindle Assembly.  
1015 *BioRxiv*. 2020.
- 1016 22. Byrnes AE, Slep KC. TOG-tubulin binding specificity promotes microtubule  
1017 dynamics and mitotic spindle formation. *J Cell Biol*. 2017;216(6):1641-57.

- 1018 23. Patel K, Nogales E, Heald R. Multiple domains of human CLASP contribute to  
1019 microtubule dynamics and organization in vitro and in *Xenopus* egg extracts.  
1020 *Cytoskeleton* (Hoboken). 2012;69(3):155-65.
- 1021 24. Al-Bassam J, Kim H, Brouhard G, van Oijen A, Harrison SC, Chang F. CLASP  
1022 promotes microtubule rescue by recruiting tubulin dimers to the microtubule. *Dev Cell*.  
1023 2010;19(2):245-58.
- 1024 25. Aher A, Kok M, Sharma A, Rai A, Olieric N, Rodriguez-Garcia R, et al. CLASP  
1025 Suppresses Microtubule Catastrophes through a Single TOG Domain. *Dev Cell*.  
1026 2018;46(1):40-58 e8.
- 1027 26. Tsvetkov AS, Samsonov A, Akhmanova A, Galjart N, Popov SV. Microtubule-  
1028 binding proteins CLASP1 and CLASP2 interact with actin filaments. *Cell Motil*  
1029 *Cytoskeleton*. 2007;64(7):519-30.
- 1030 27. Dumont J, Oegema K, Desai A. A kinetochore-independent mechanism drives  
1031 anaphase chromosome separation during acentrosomal meiosis. *Nat Cell Biol*.  
1032 2010;12(9):894-901.
- 1033 28. Maton G, Edwards F, Lacroix B, Stefanutti M, Laband K, Lieury T, et al.  
1034 Kinetochore components are required for central spindle assembly. *Nat Cell Biol*.  
1035 2015;17(7):953.
- 1036 29. Espiritu EB, Krueger LE, Ye A, Rose LS. CLASPs function redundantly to  
1037 regulate astral microtubules in the *C. elegans* embryo. *Dev Biol*. 2012;368(2):242-54.
- 1038 30. Pelisch F, Bel Borja L, Jaffray EG, Hay RT. Sumoylation regulates protein  
1039 dynamics during meiotic chromosome segregation in. *J Cell Sci*. 2019;132(14).
- 1040 31. Tanenbaum ME, Macůrek L, Janssen A, Geers EF, Alvarez-Fernández M,  
1041 Medema RH. Kif15 cooperates with eg5 to promote bipolar spindle assembly. *Curr Biol*.  
1042 2009;19(20):1703-11.
- 1043 32. Sturgill EG, Ohi R. Kinesin-12 differentially affects spindle assembly depending  
1044 on its microtubule substrate. *Curr Biol*. 2013;23(14):1280-90.
- 1045 33. Vanneste D, Takagi M, Imamoto N, Vernos I. The role of Hklp2 in the  
1046 stabilization and maintenance of spindle bipolarity. *Curr Biol*. 2009;19(20):1712-7.
- 1047 34. Connolly AA, Osterberg V, Christensen S, Price M, Lu C, Chicas-Cruz K, et al.  
1048 *Caenorhabditis elegans* oocyte meiotic spindle pole assembly requires microtubule

- 1049 severing and the calponin homology domain protein ASPM-1. *Mol Biol Cell*.  
1050 2014;25(8):1298-311.
- 1051 35. Wignall SM, Villeneuve AM. Lateral microtubule bundles promote chromosome  
1052 alignment during acentrosomal oocyte meiosis. *Nat Cell Biol*. 2009;11(7):839-44.
- 1053 36. Wolff ID, Tran MV, Mullen TJ, Villeneuve AM, Wignall SM. Assembly of  
1054 *Caenorhabditis elegans* acentrosomal spindles occurs without evident microtubule-  
1055 organizing centers and requires microtubule sorting by KLP-18/kinesin-12 and MESP-1.  
1056 *Mol Biol Cell*. 2016;27(20):3122-31.
- 1057 37. Clark-Maguire S, Mains PE. *mei-1*, a gene required for meiotic spindle formation  
1058 in *Caenorhabditis elegans*, is a member of a family of ATPases. *Genetics*.  
1059 1994;136(2):533-46.
- 1060 38. Srayko M, Buster DW, Bazirgan OA, McNally FJ, Mains PE. MEI-1/MEI-2  
1061 katanin-like microtubule severing activity is required for *Caenorhabditis elegans*  
1062 meiosis. *Genes Dev*. 2000;14(9):1072-84.
- 1063 39. McNally K, Berg E, Cortes DB, Hernandez V, Mains PE, McNally FJ. Katanin  
1064 maintains meiotic metaphase chromosome alignment and spindle structure in vivo and  
1065 has multiple effects on microtubules in vitro. *Mol Biol Cell*. 2014;25(7):1037-49.
- 1066 40. Joly N, Martino L, Gigant E, Dumont J, Pintard L. Microtubule-severing activity of  
1067 the AAA+ ATPase Katanin is essential for female meiotic spindle assembly.  
1068 *Development*. 2016;143(19):3604-14.
- 1069 41. Laband K, Le Borgne R, Edwards F, Stefanutti M, Canman JC, Verbavatz JM, et  
1070 al. Chromosome segregation occurs by microtubule pushing in oocytes. *Nat Commun*.  
1071 2017;8(1):1499.
- 1072 42. Han X, Gomes JE, Birmingham CL, Pintard L, Sugimoto A, Mains PE. The role of  
1073 protein phosphatase 4 in regulating microtubule severing in the *Caenorhabditis elegans*  
1074 embryo. *Genetics*. 2009;181(3):933-43.
- 1075 43. Gomes JE, Tavernier N, Richaudeau B, Formstecher E, Boulin T, Mains PE, et  
1076 al. Microtubule severing by the katanin complex is activated by PPFR-1-dependent MEI-  
1077 1 dephosphorylation. *J Cell Biol*. 2013;202(3):431-9.



- 1078 44. Connolly AA, Sugioka K, Chuang CH, Lowry JB, Bowerman B. KLP-7 acts  
1079 through the Ndc80 complex to limit pole number in *C. elegans* oocyte meiotic spindle  
1080 assembly. *J Cell Biol.* 2015;210(6):917-32.
- 1081 45. Davis-Roca AC, Muscat CC, Wignall SM. oocytes detect meiotic errors in the  
1082 absence of canonical end-on kinetochore attachments. *J Cell Biol.* 2017;216(5):1243-  
1083 53.
- 1084 46. Piekny AJ, Maddox AS. The myriad roles of Anillin during cytokinesis. *Semin Cell*  
1085 *Dev Biol.* 2010;21(9):881-91.
- 1086 47. Srayko M, O'toole ET, Hyman AA, Müller-Reichert T. Katanin disrupts the  
1087 microtubule lattice and increases polymer number in *C. elegans* meiosis. *Curr Biol.*  
1088 2006;16(19):1944-9.
- 1089 48. Inoue YH, Savoian MS, Suzuki T, Máthé E, Yamamoto MT, Glover DM.  
1090 Mutations in orbit/mast reveal that the central spindle is comprised of two microtubule  
1091 populations, those that initiate cleavage and those that propagate furrow ingression. *J*  
1092 *Cell Biol.* 2004;166(1):49-60.
- 1093 49. Crowder ME, Flynn JR, McNally KP, Cortes DB, Price KL, Kuehnert PA, et al.  
1094 Dynactin-dependent cortical dynein and spherical spindle shape correlate temporally  
1095 with meiotic spindle rotation in *Caenorhabditis elegans*. *Mol Biol Cell.*  
1096 2015;26(17):3030-46.
- 1097 50. Hagmann J, Burger MM, Dagan D. Regulation of plasma membrane blebbing by  
1098 the cytoskeleton. *J Cell Biochem.* 1999;73(4):488-99.
- 1099 51. Sugiyama T, Pramanik MK, Yumura S. Microtubule-Mediated Inositol Lipid  
1100 Signaling Plays Critical Roles in Regulation of Blebbing. *PLoS One.*  
1101 2015;10(8):e0137032.
- 1102 52. Tinevez JY, Schulze U, Salbreux G, Roensch J, Joanny JF, Paluch E. Role of  
1103 cortical tension in bleb growth. *Proc Natl Acad Sci U S A.* 2009;106(44):18581-6.
- 1104 53. Mimori-Kiyosue Y, Grigoriev I, Lansbergen G, Sasaki H, Matsui C, Severin F, et  
1105 al. CLASP1 and CLASP2 bind to EB1 and regulate microtubule plus-end dynamics at  
1106 the cell cortex. *J Cell Biol.* 2005;168(1):141-53.

- 1107 54. Lansbergen G, Grigoriev I, Mimori-Kiyosue Y, Ohtsuka T, Higa S, Kitajima I, et  
1108 al. CLASPs attach microtubule plus ends to the cell cortex through a complex with  
1109 LL5beta. *Dev Cell*. 2006;11(1):21-32.
- 1110 55. Gigant E, Stefanutti M, Laband K, Gluszek-Kustusz A, Edwards F, Lacroix B, et  
1111 al. Inhibition of ectopic microtubule assembly by the kinesin-13 KLP-7 prevents  
1112 chromosome segregation and cytokinesis defects in oocytes. *Development*.  
1113 2017;144(9):1674-86.
- 1114 56. Brenner S. The genetics of *Caenorhabditis elegans*. *Genetics*. 1974;77(1):71-94.
- 1115 57. Paix A, Folkmann A, Rasoloson D, Seydoux G. High Efficiency, Homology-  
1116 Directed Genome Editing in *Caenorhabditis elegans* Using CRISPR-Cas9  
1117 Ribonucleoprotein Complexes. *Genetics*. 2015;201(1):47-54.
- 1118 58. Kamath RS, Martinez-Campos M, Zipperlen P, Fraser AG, Ahringer J.  
1119 Effectiveness of specific RNA-mediated interference through ingested double-stranded  
1120 RNA in *Caenorhabditis elegans*. *Genome Biol*. 2001;2(1):RESEARCH0002.
- 1121 59. Fraser AG, Kamath RS, Zipperlen P, Martinez-Campos M, Sohrmann M,  
1122 Ahringer J. Functional genomic analysis of *C. elegans* chromosome I by systematic  
1123 RNA interference. *Nature*. 2000;408(6810):325-30.
- 1124 60. Schindelin J, Arganda-Carreras I, Frise E, Kaynig V, Longair M, Pietzsch T, et al.  
1125 Fiji: an open-source platform for biological-image analysis. *Nat Methods*. 2012;9(7):676-  
1126 82.
- 1127 61. Barry DJ, Durkin CH, Abella JV, Way M. Open source software for quantification  
1128 of cell migration, protrusions, and fluorescence intensities. *J Cell Biol*. 2015;209(1):163-  
1129 80.
- 1130

**Fig 1**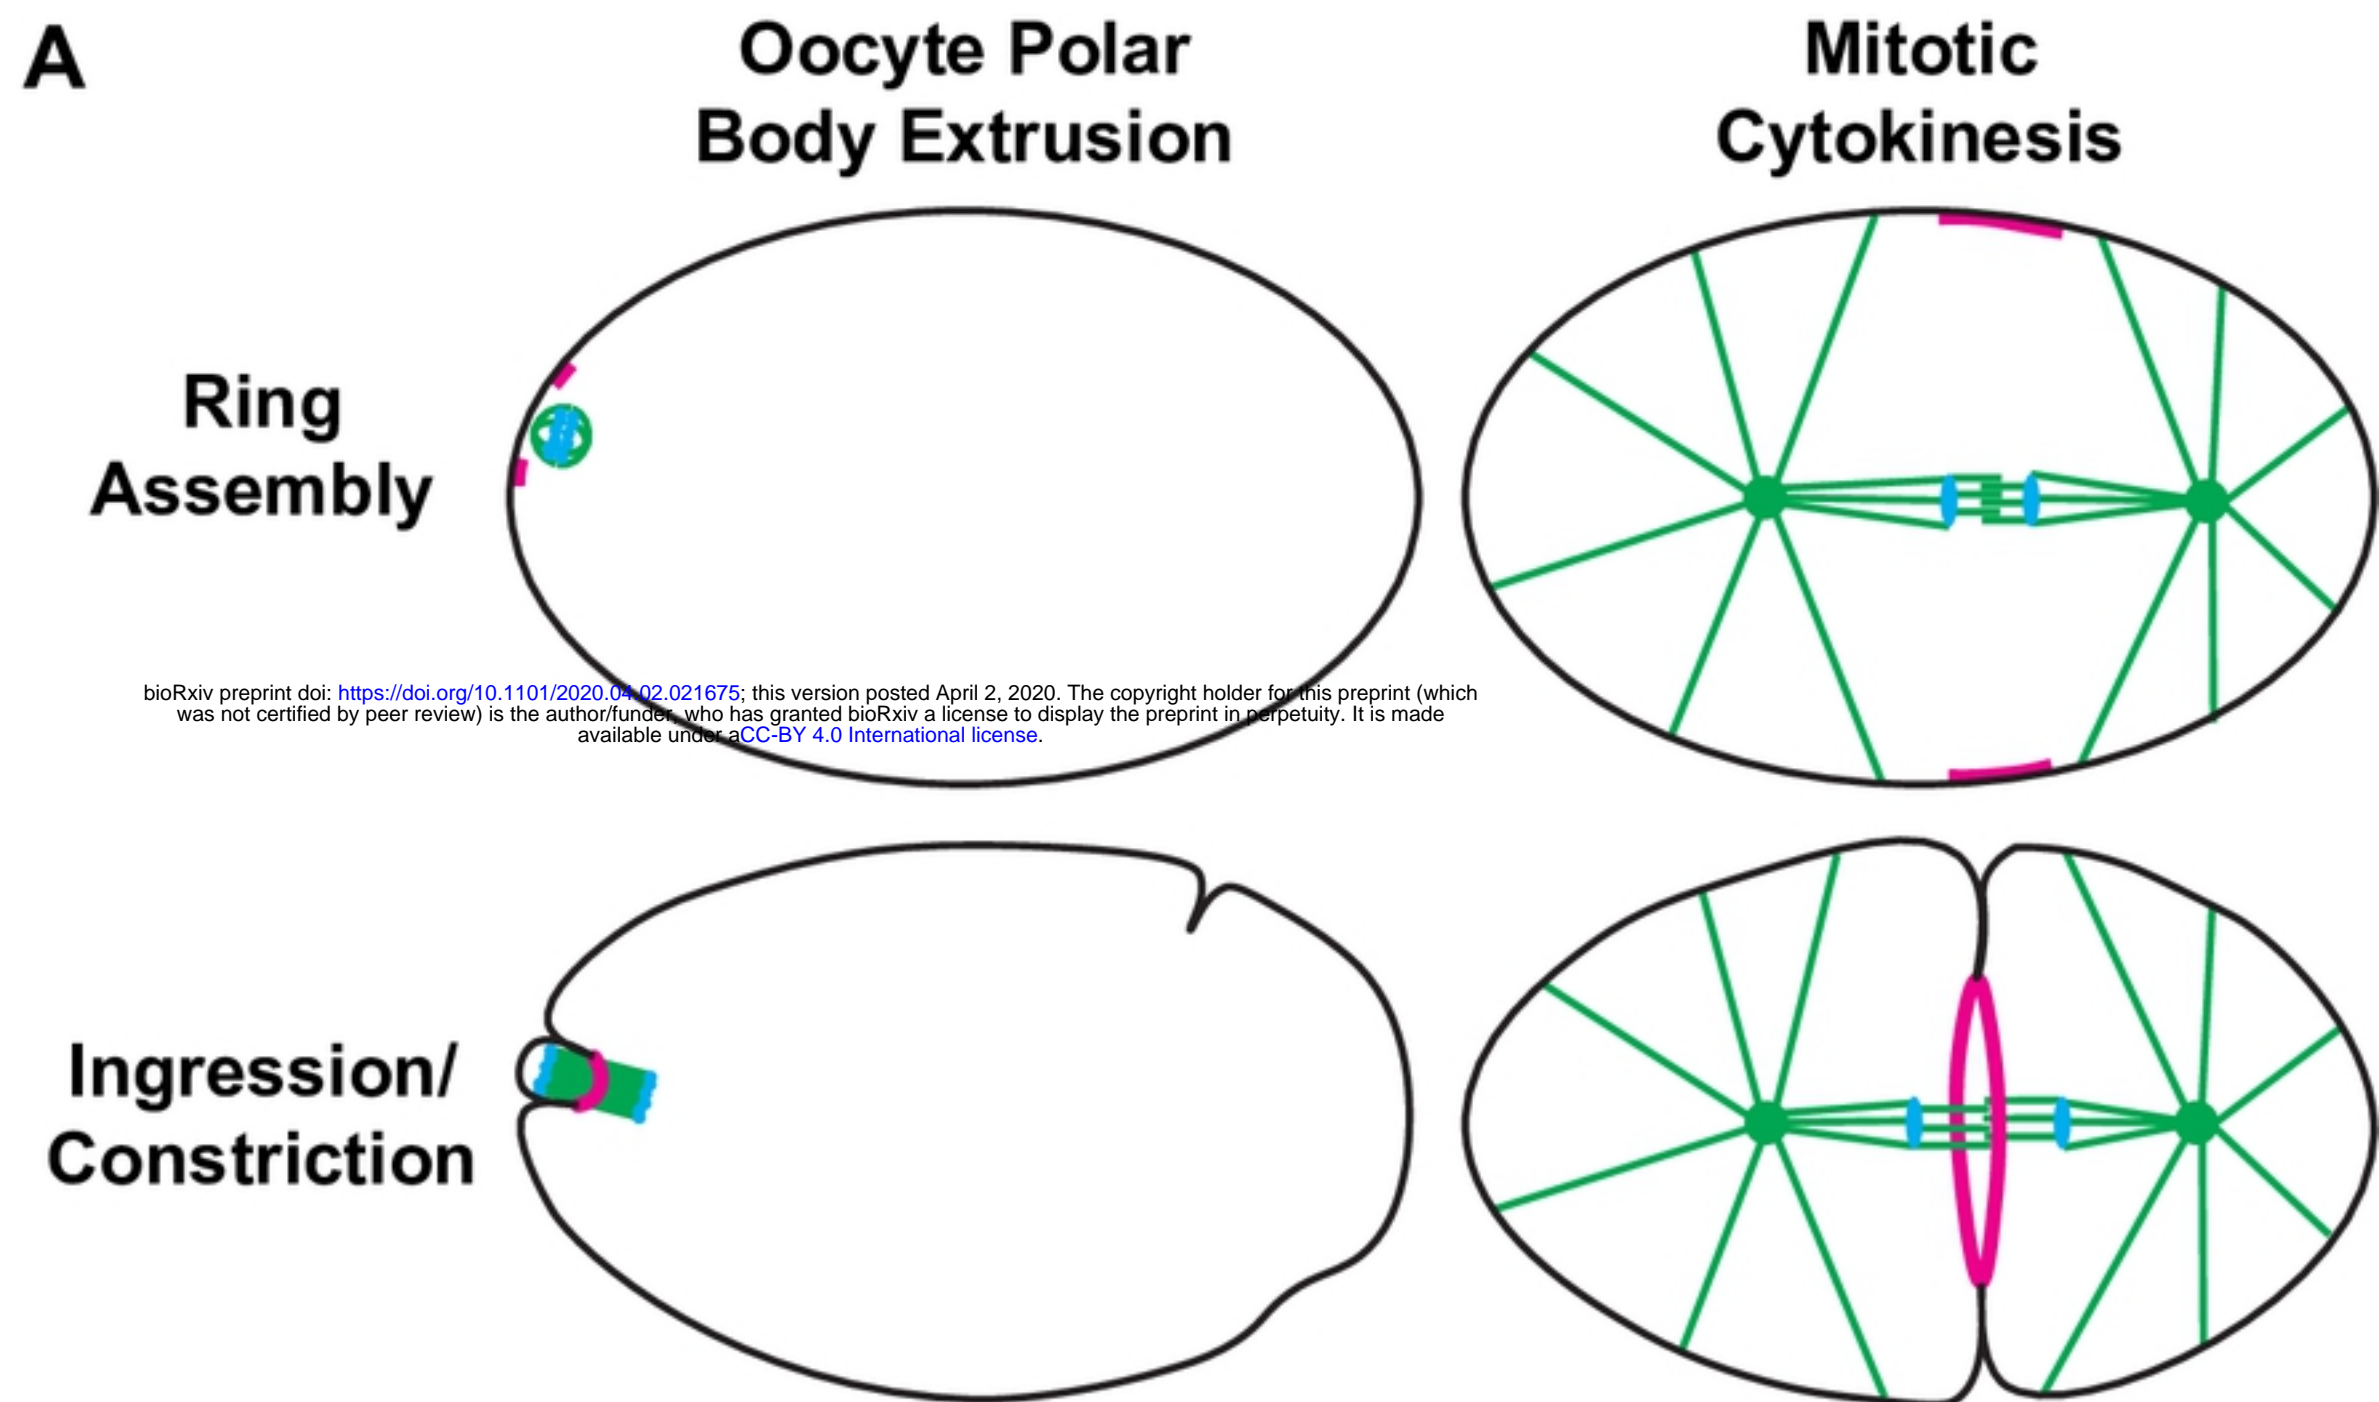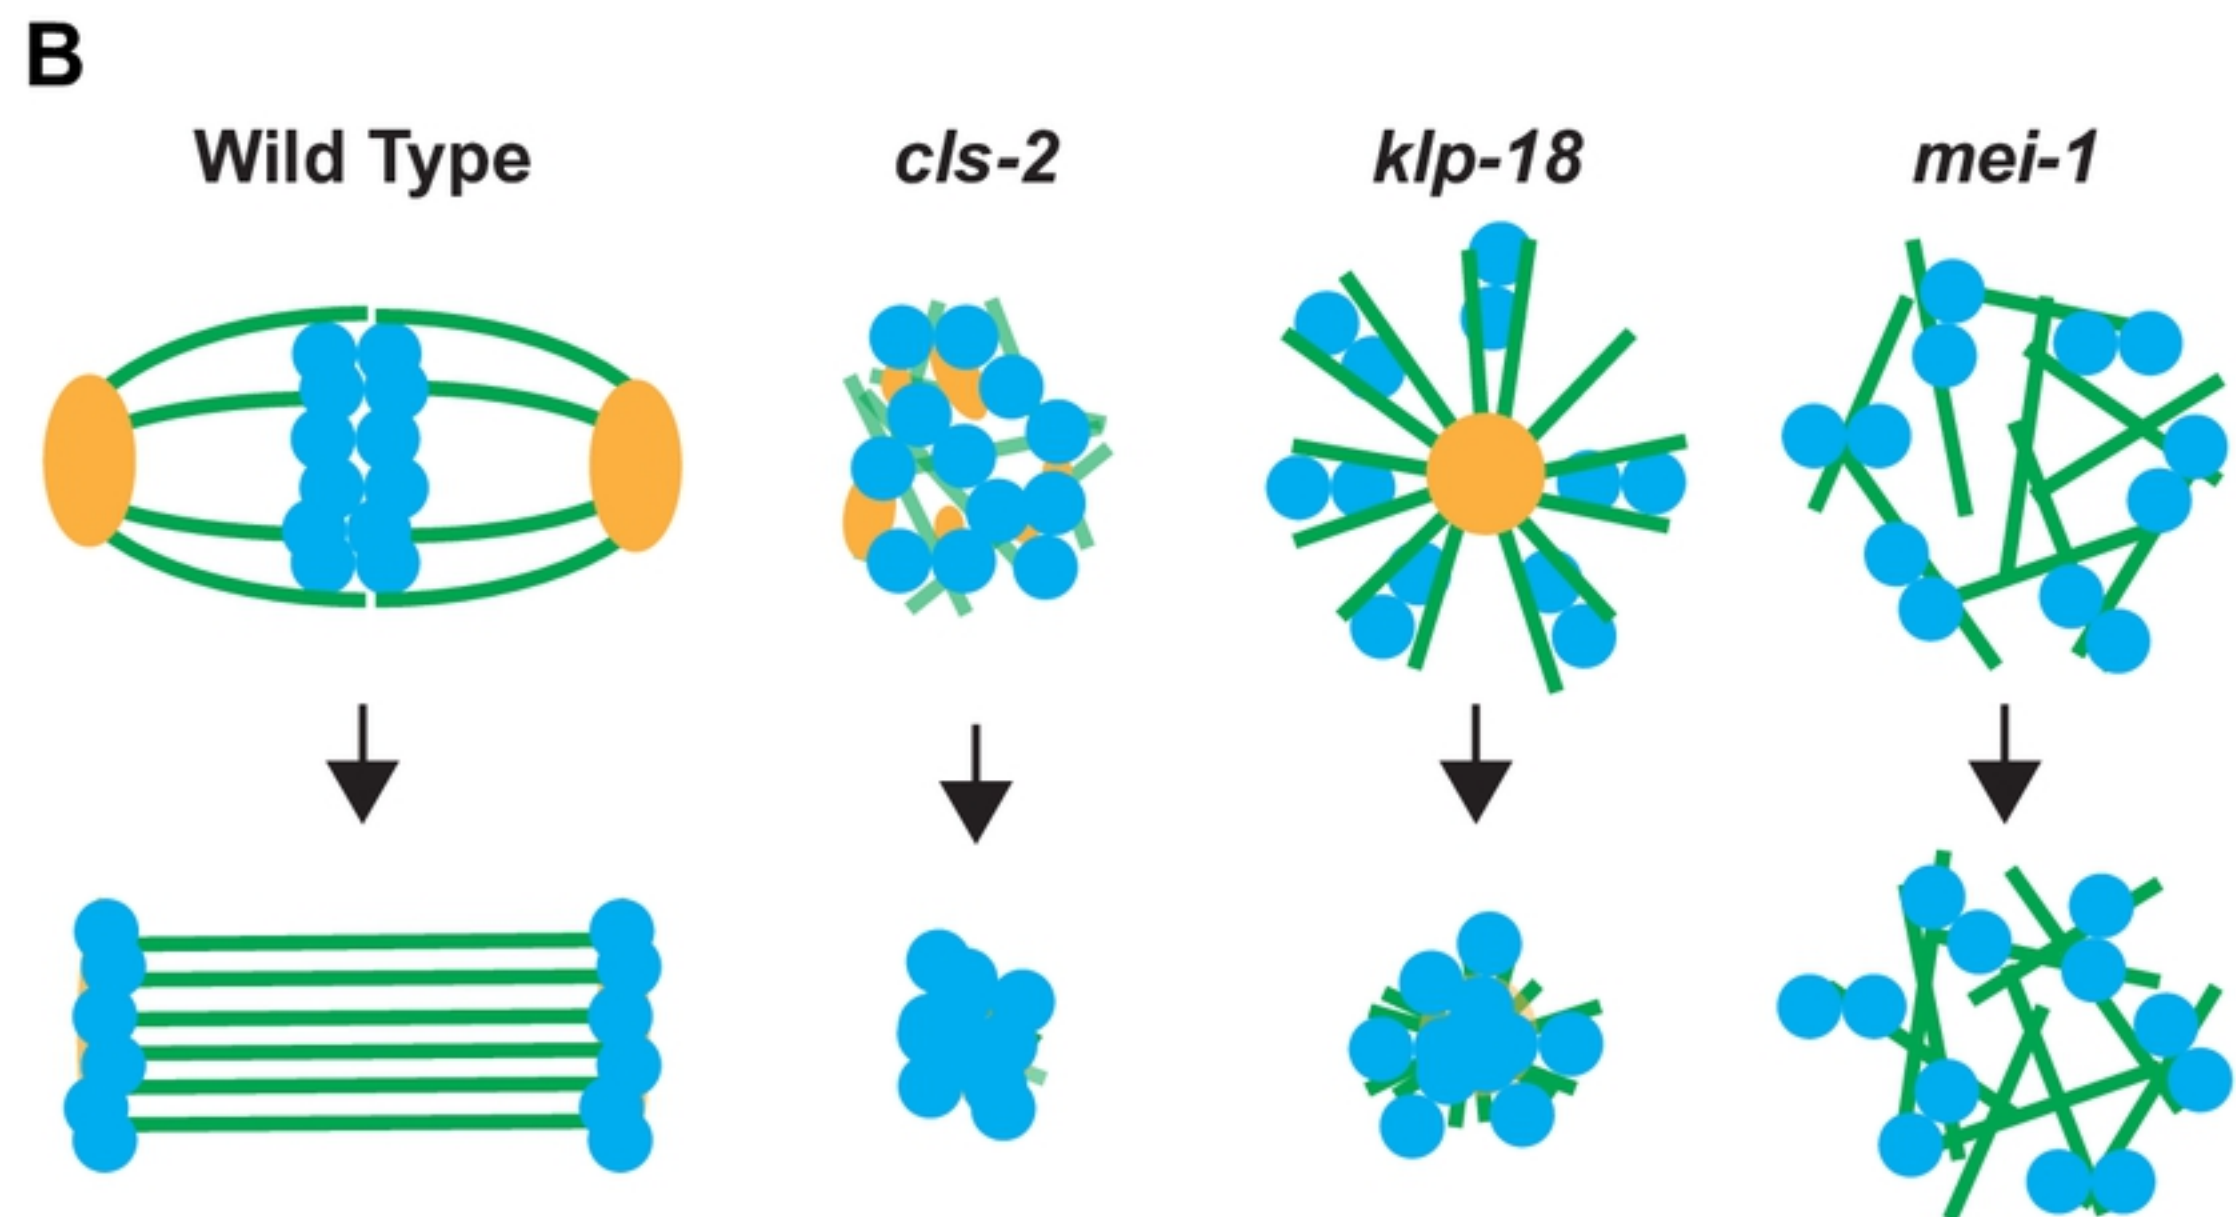**Fig 1**

Fig 2

A **CLS-2::GFP ; mCherry::H2B**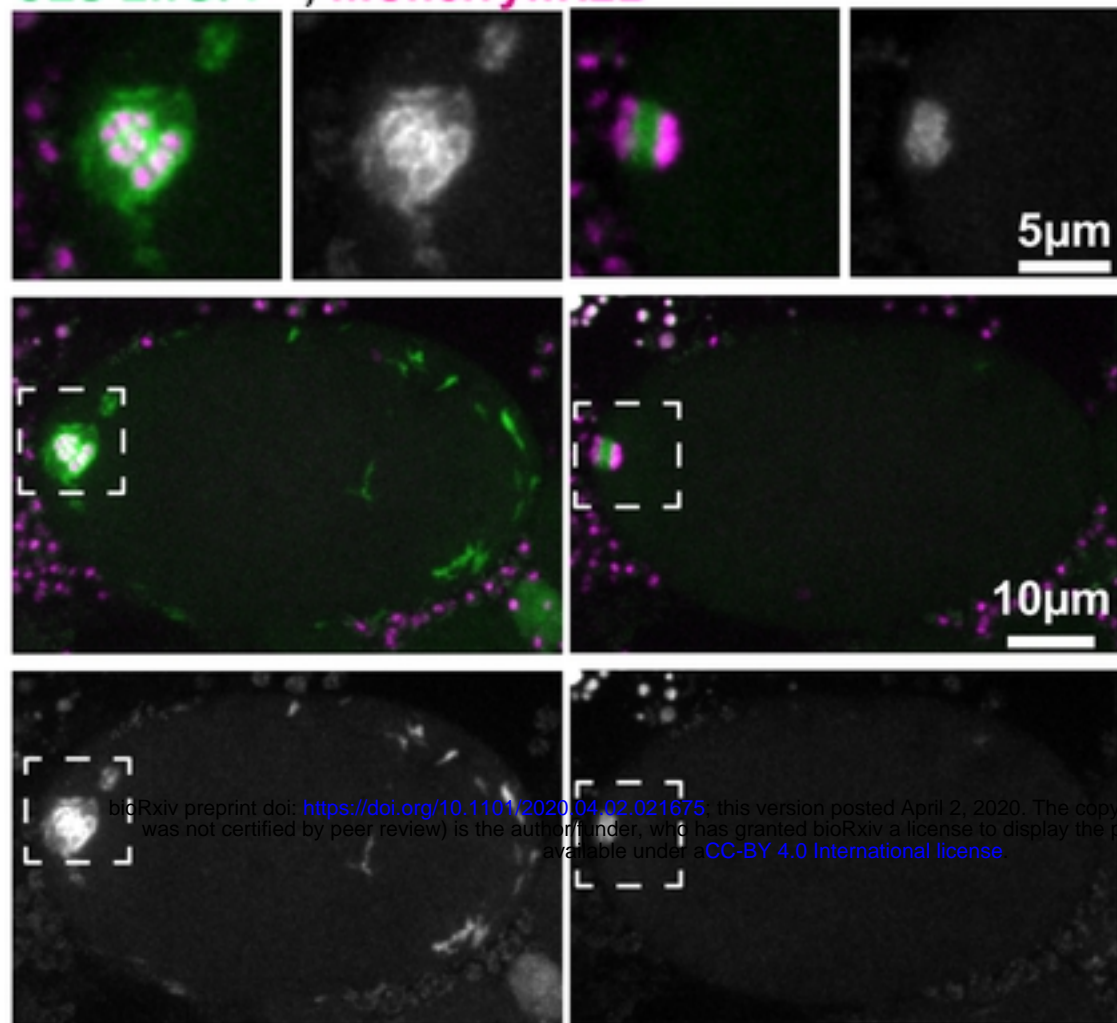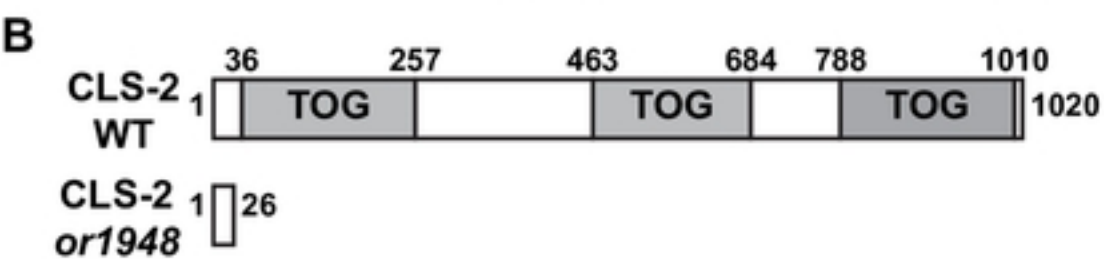

**C**

| Allele               | Embryonic Viability (%) |
|----------------------|-------------------------|
| Wild Type            | 99 (n=844)              |
| <i>cls-2(or1948)</i> | 0 (n=375)               |
| <i>cls-2(or1949)</i> | 0 (n=436)               |
| <i>cls-2(or1950)</i> | 0 (n=1314)              |
| <i>cls-2(or1951)</i> | 0 (n=724)               |

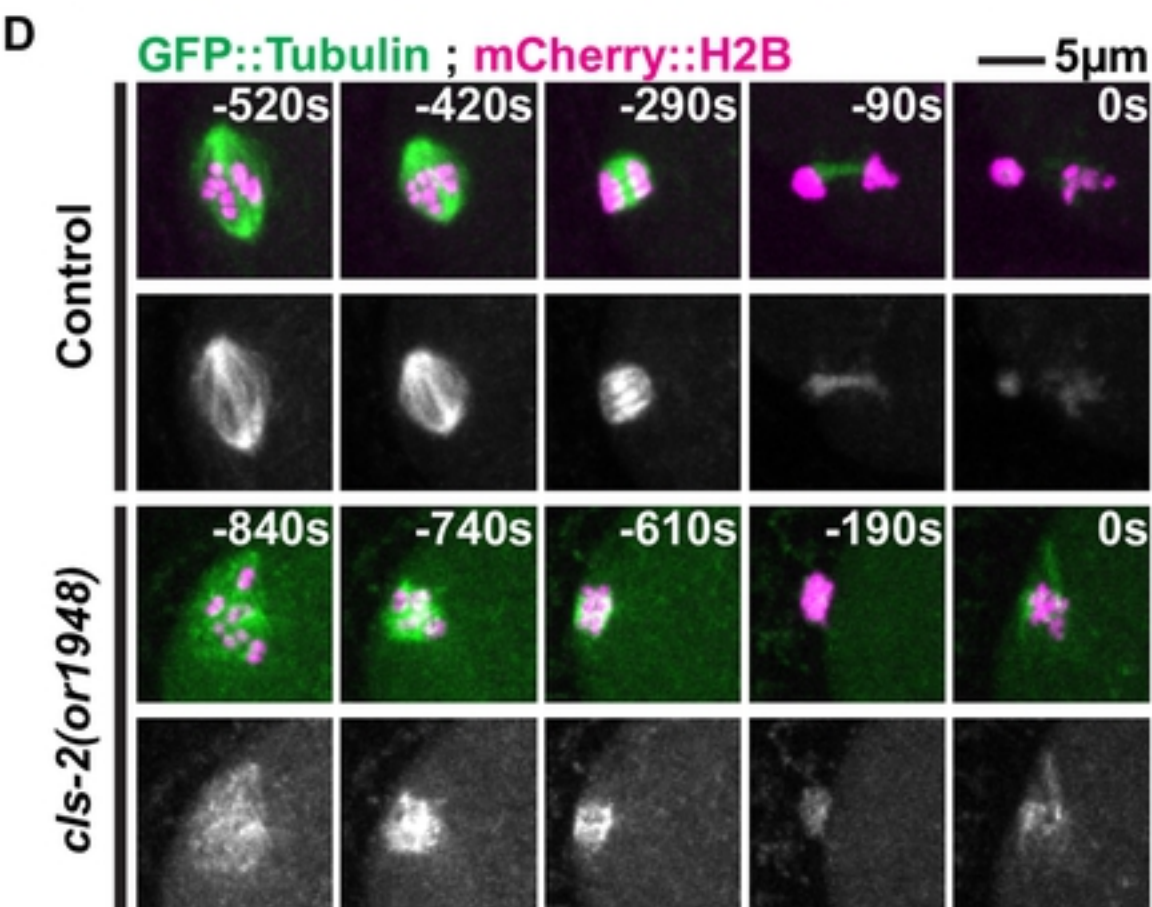

**E** **Microtubule Intensity Over Time**

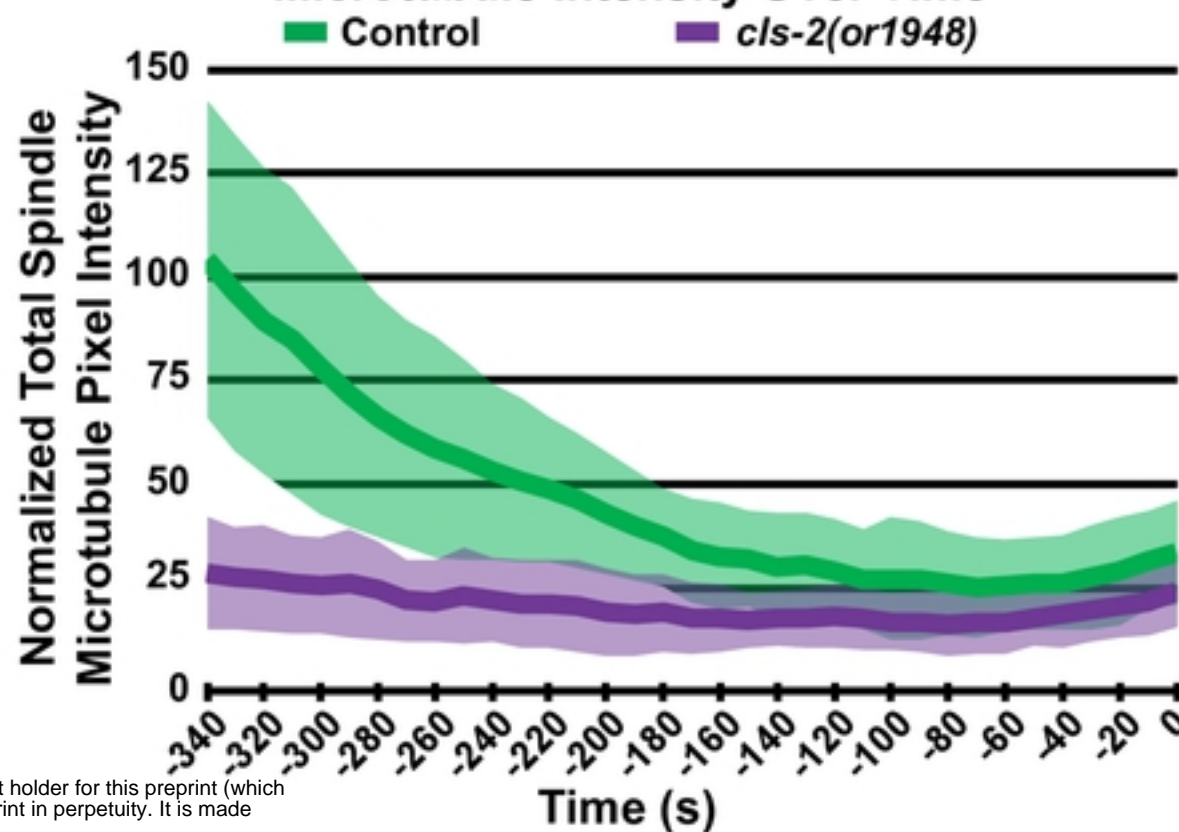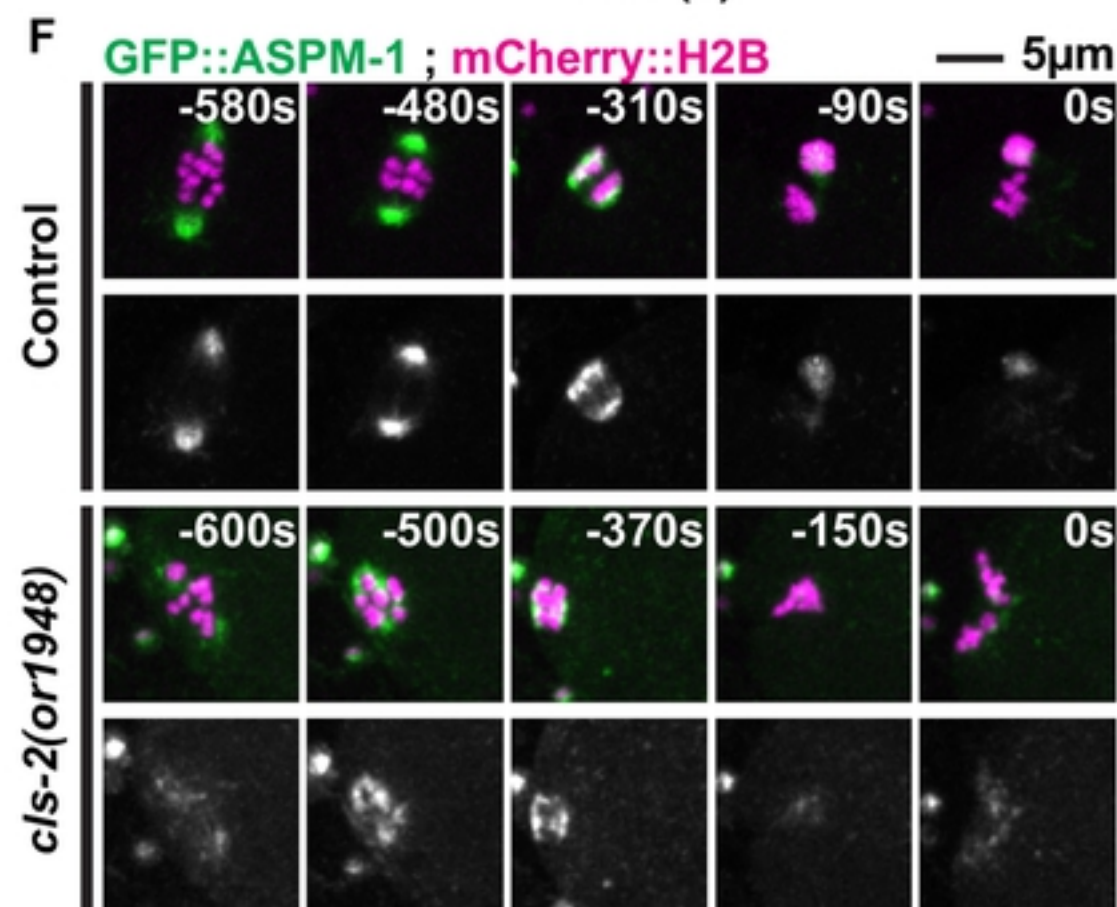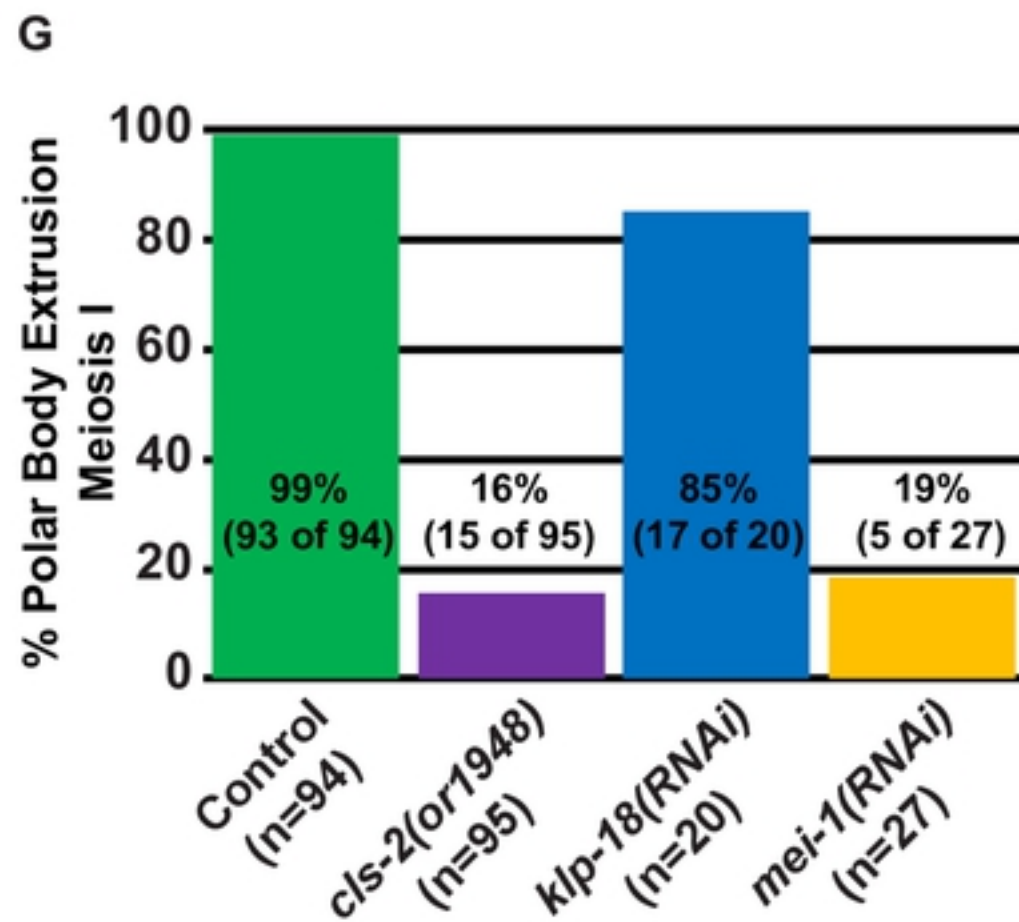

Fig 2

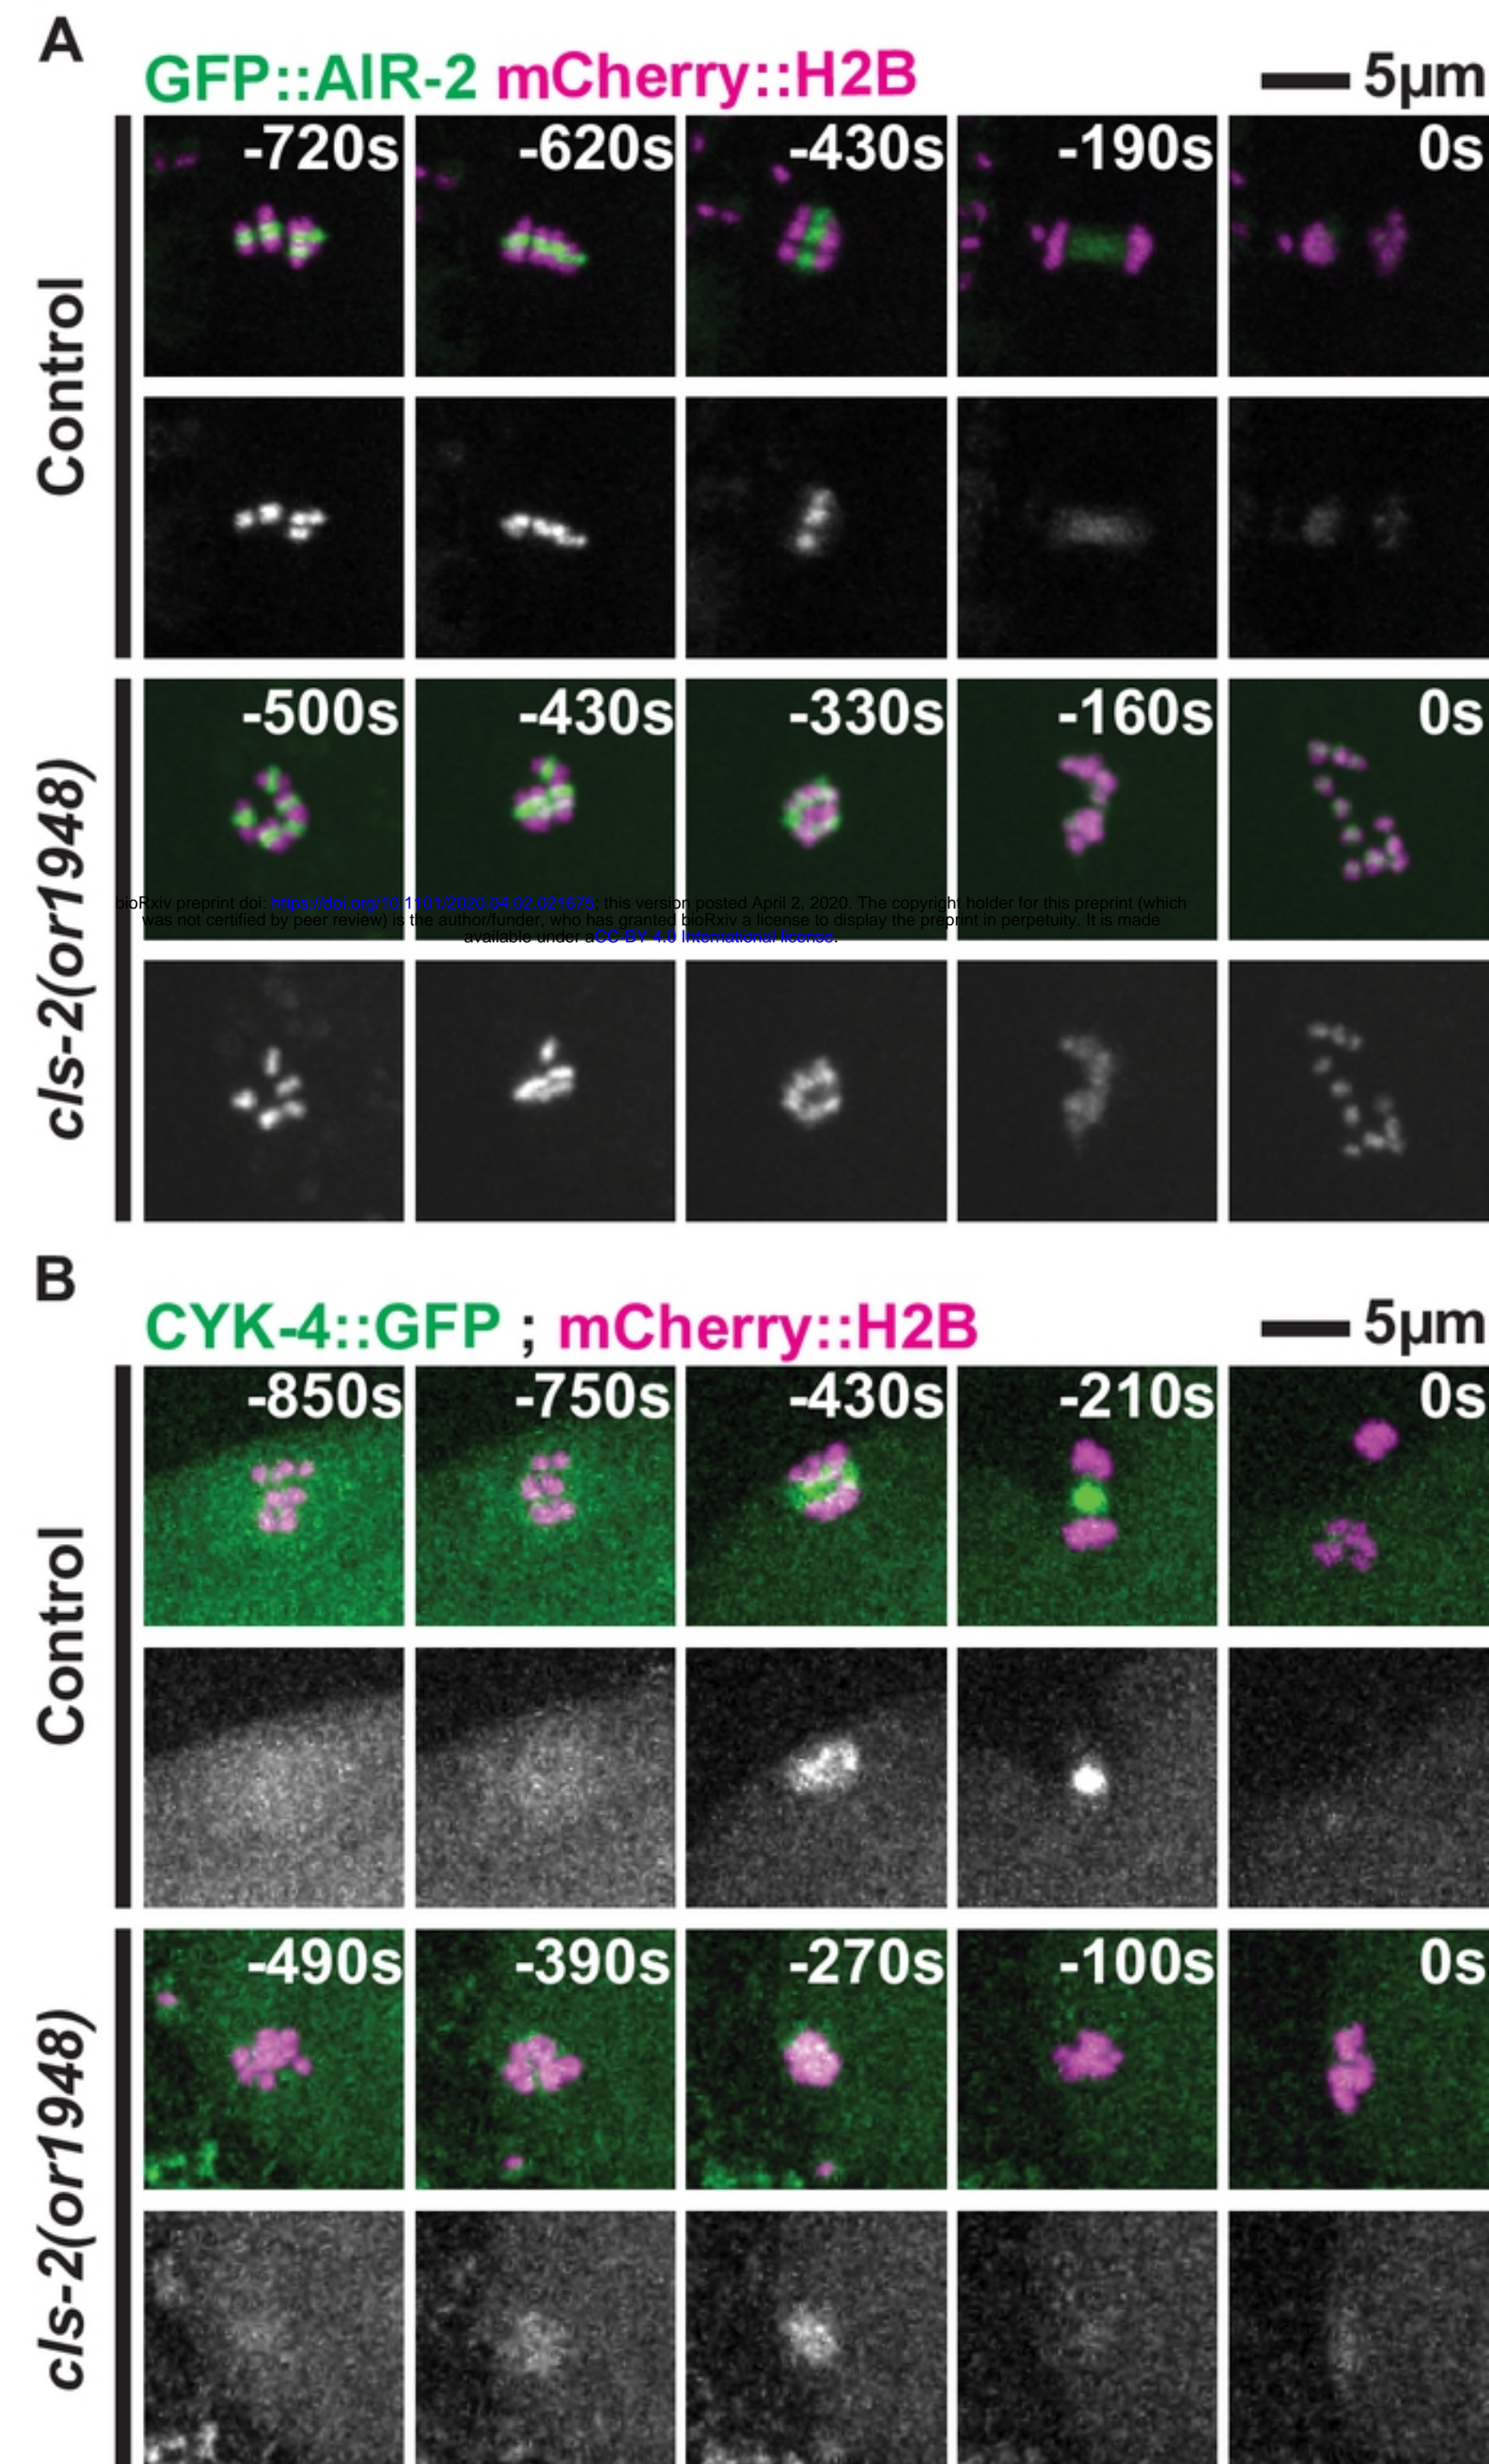

mCherry:PH ; GFP::H2B

— 5 $\mu$ m

Control

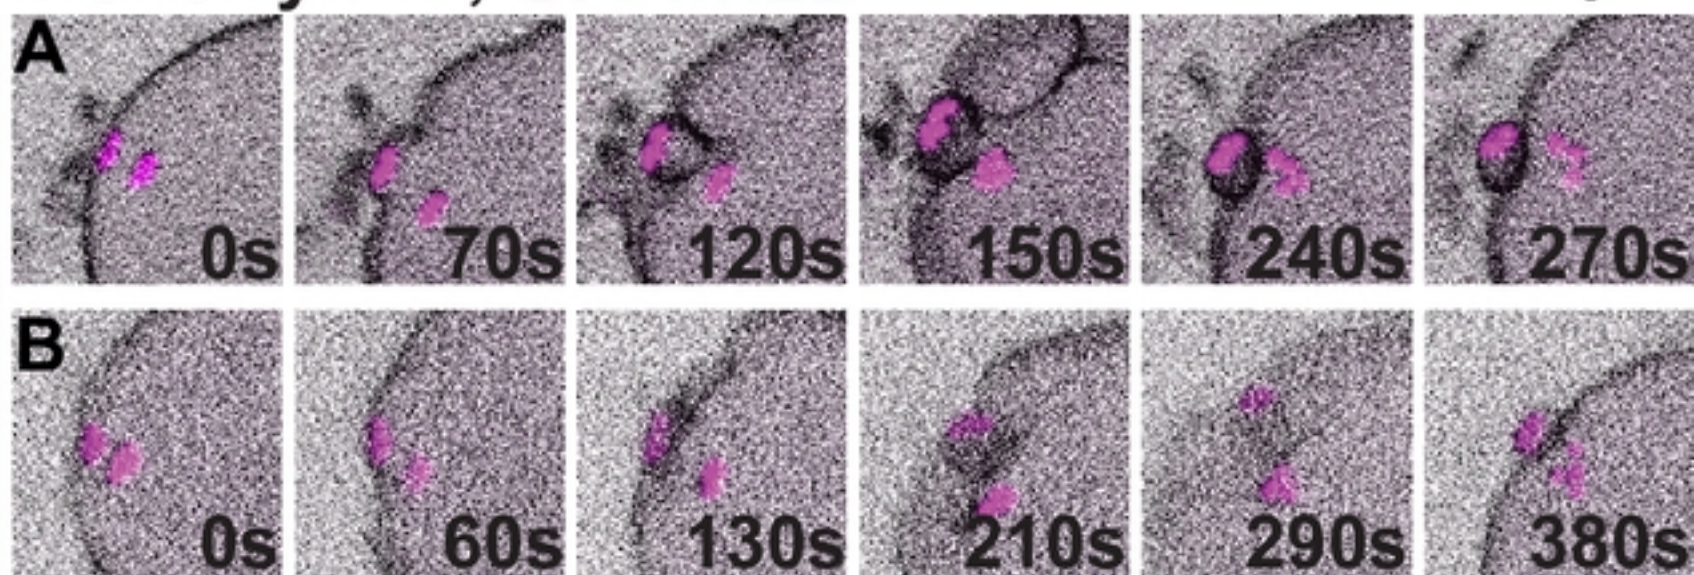*cls-2(or1948)*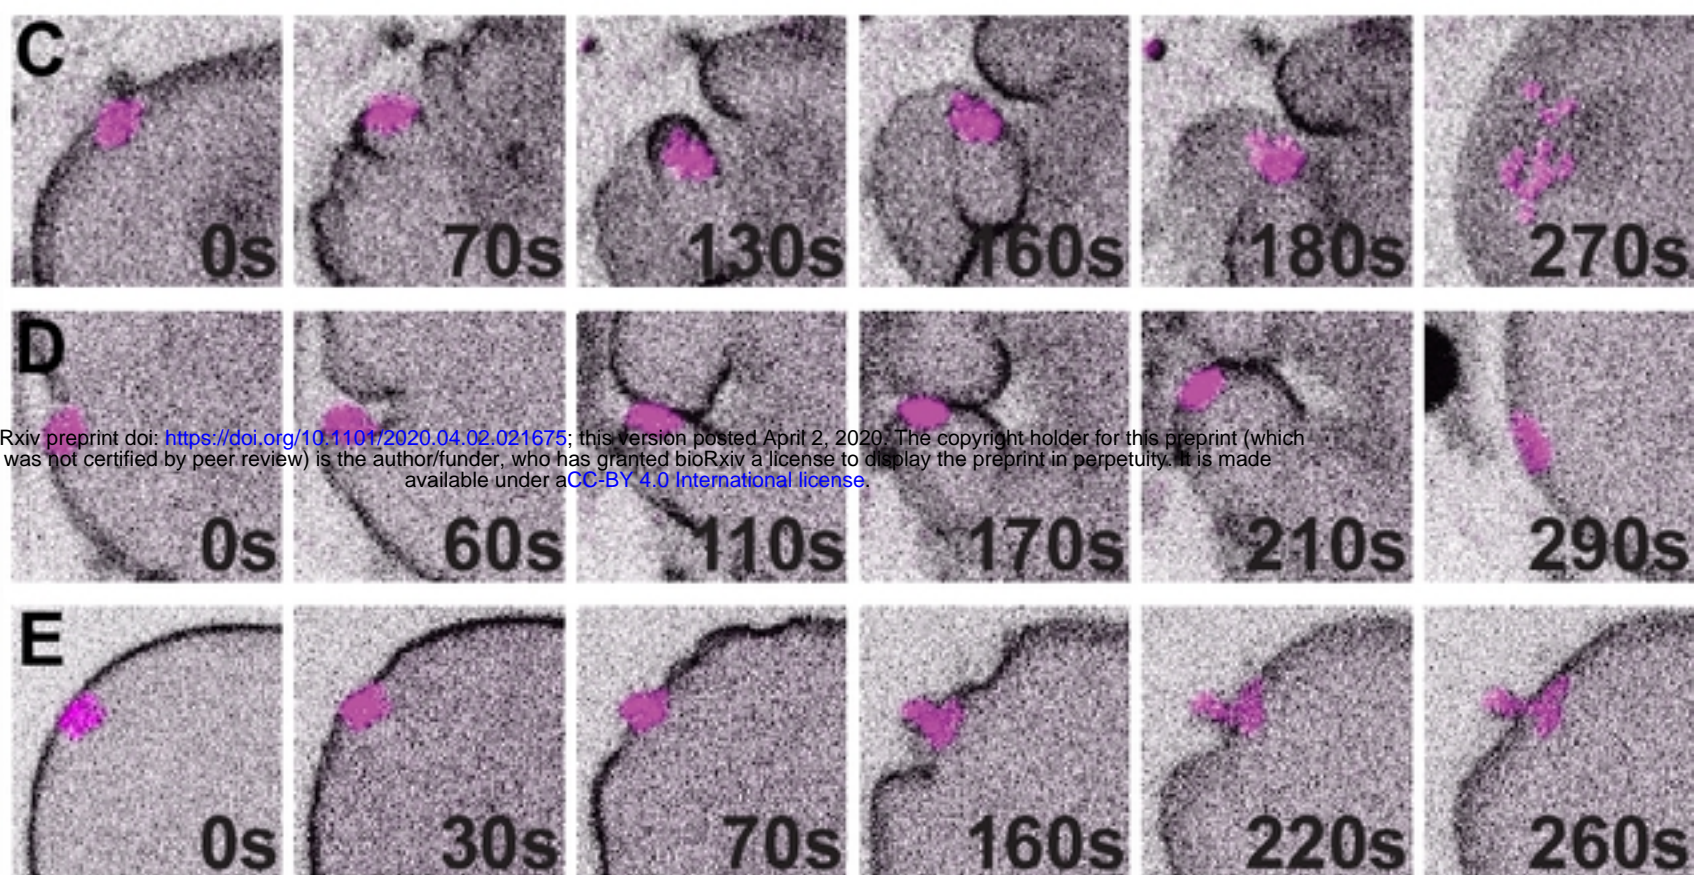*klp-18(RNAi)*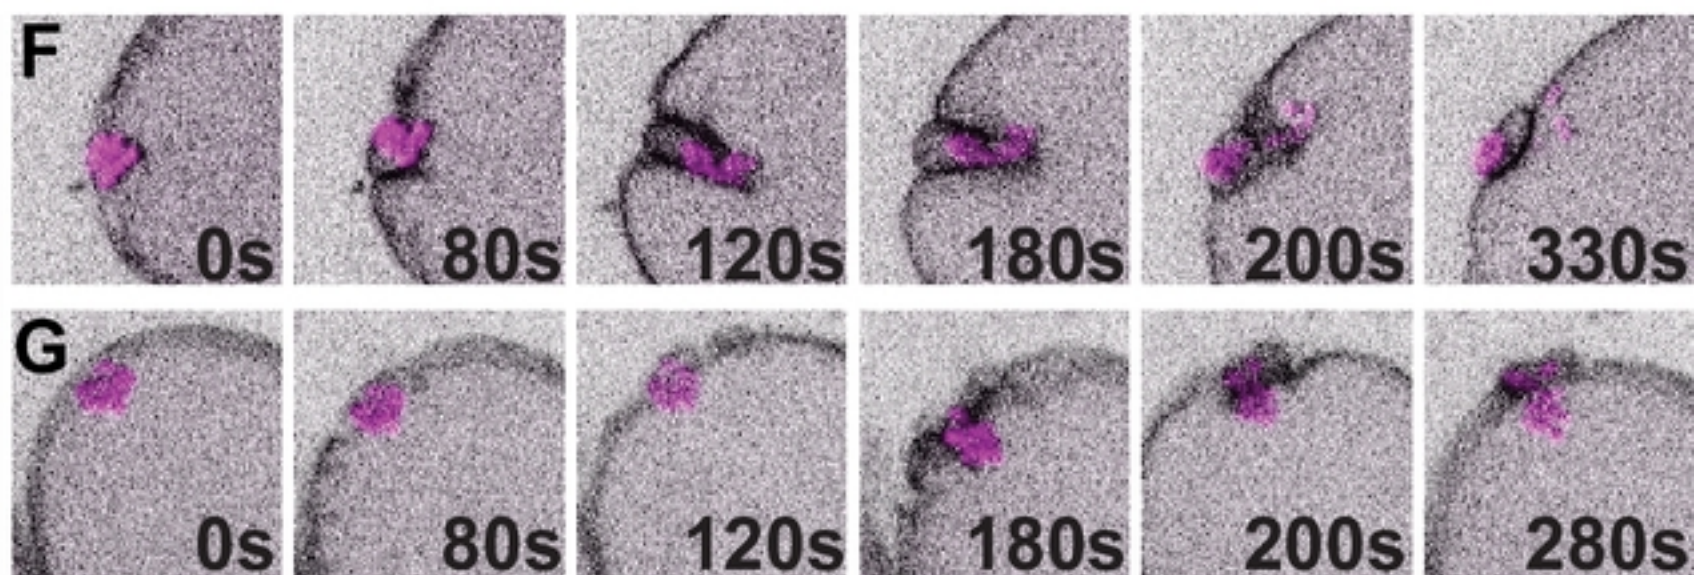*mei-1(RNAi)*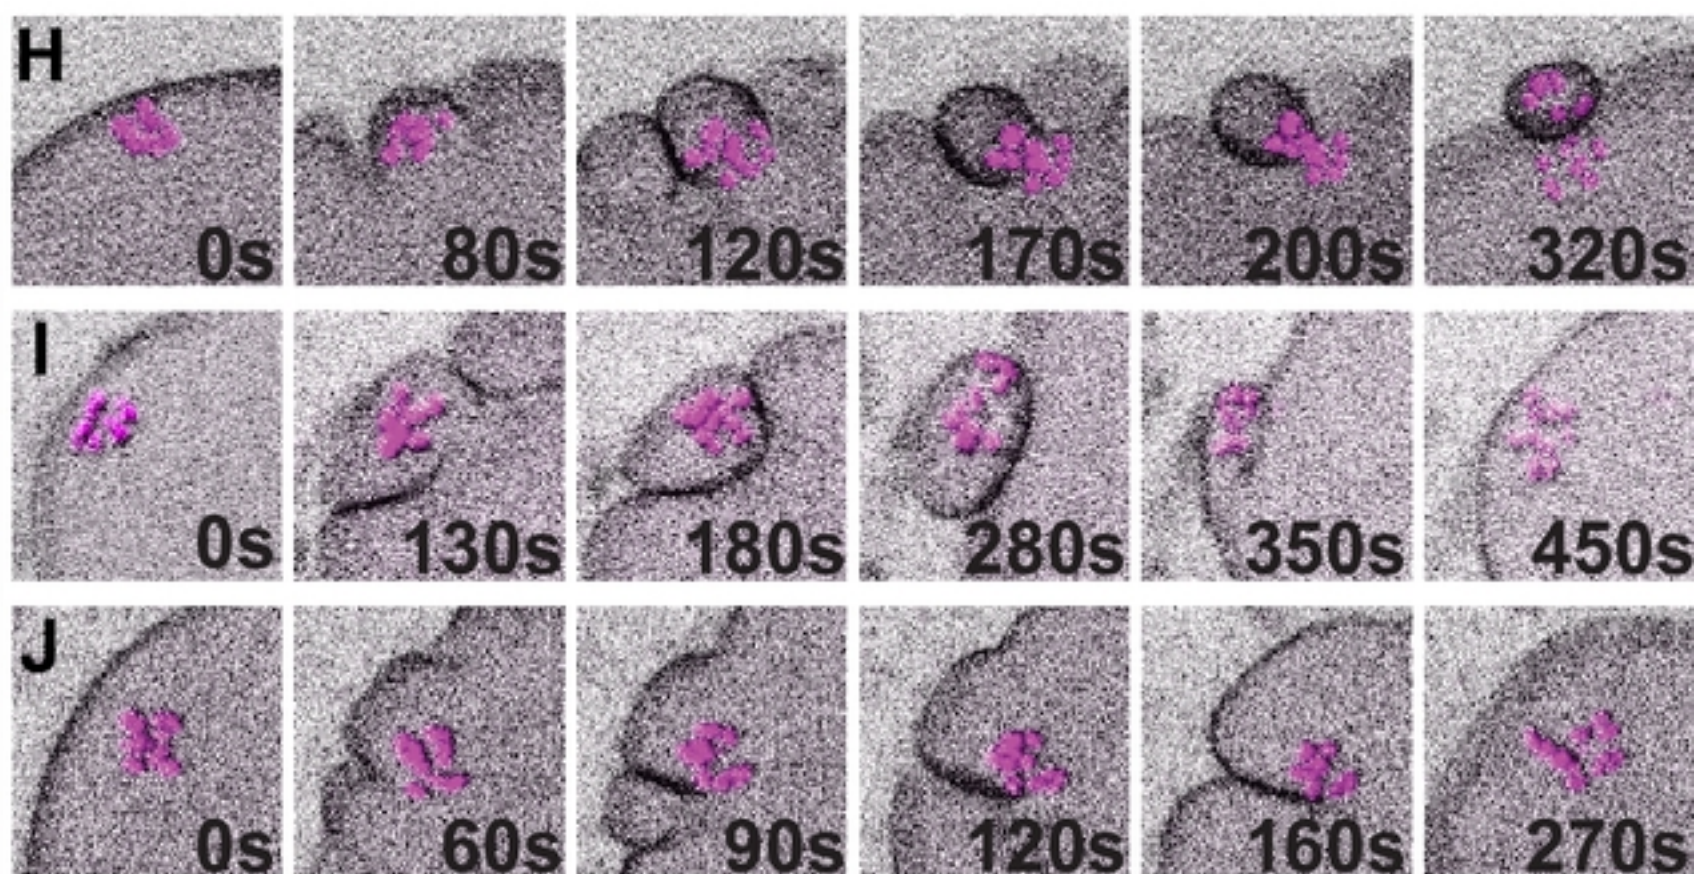

Fig 5

NMY-2::GFP ; mCh::H2B

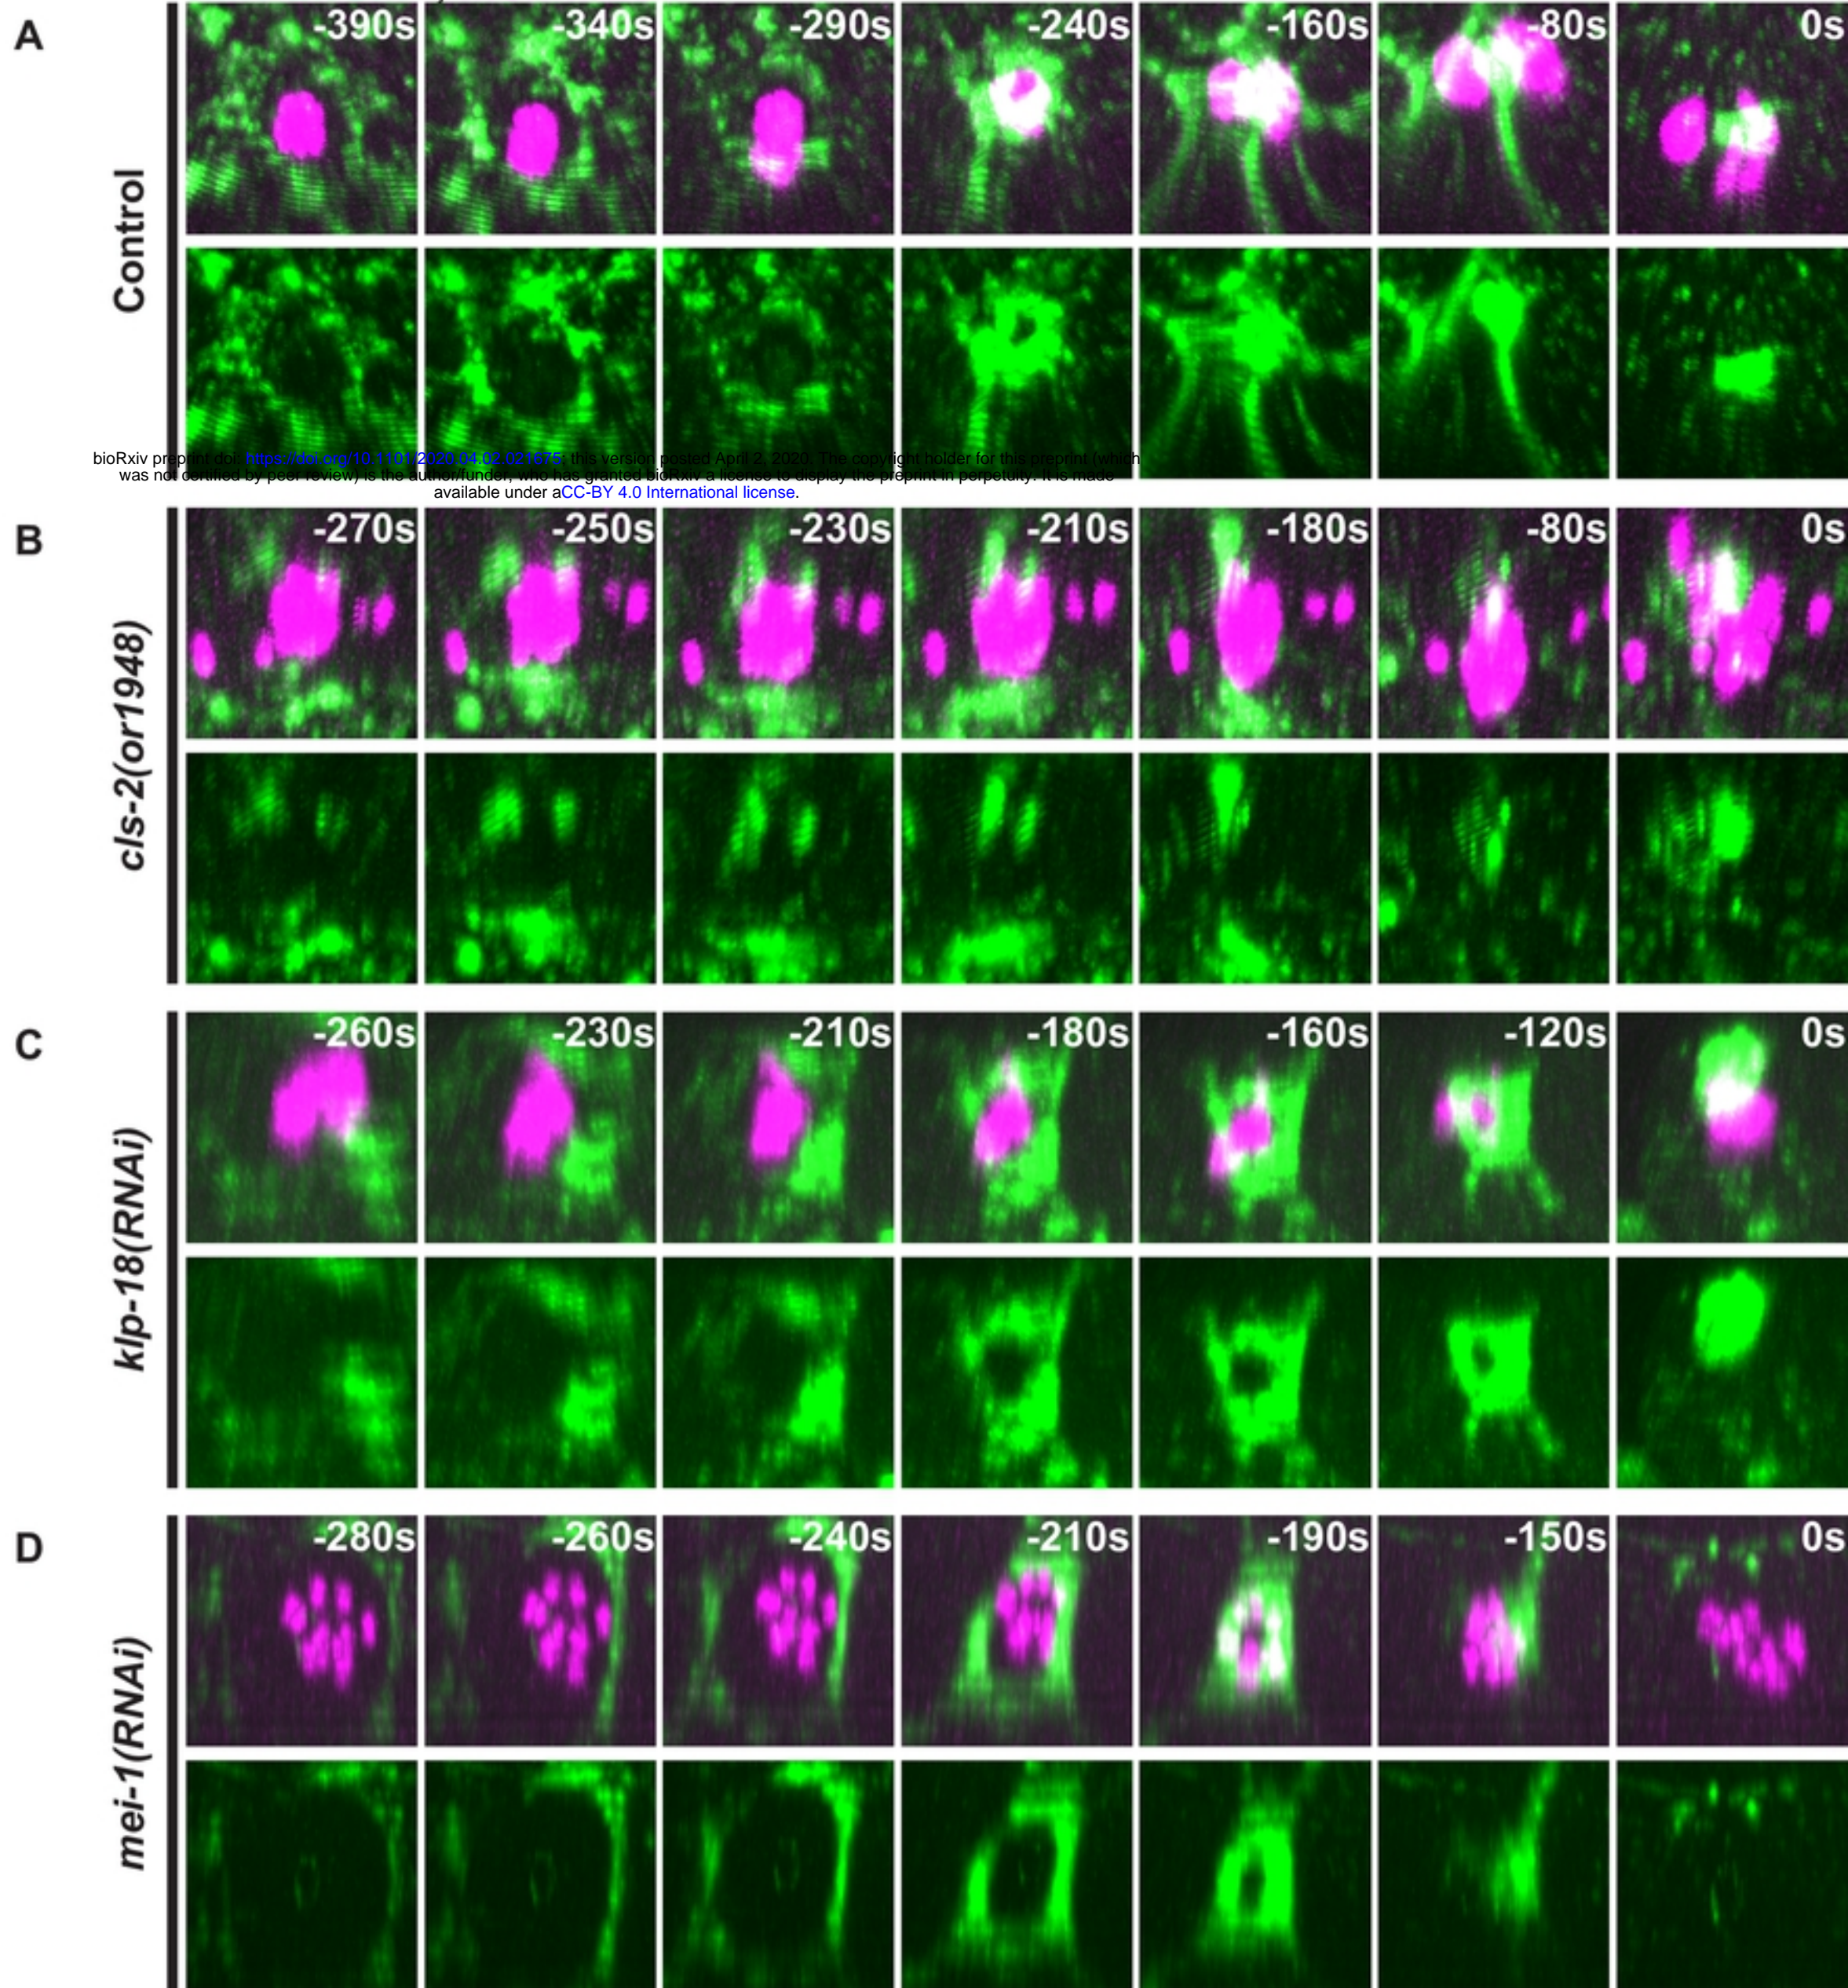

Fig 5

Fig 6

A

mNeonGreen::ANI-1 ; mCh::H2B

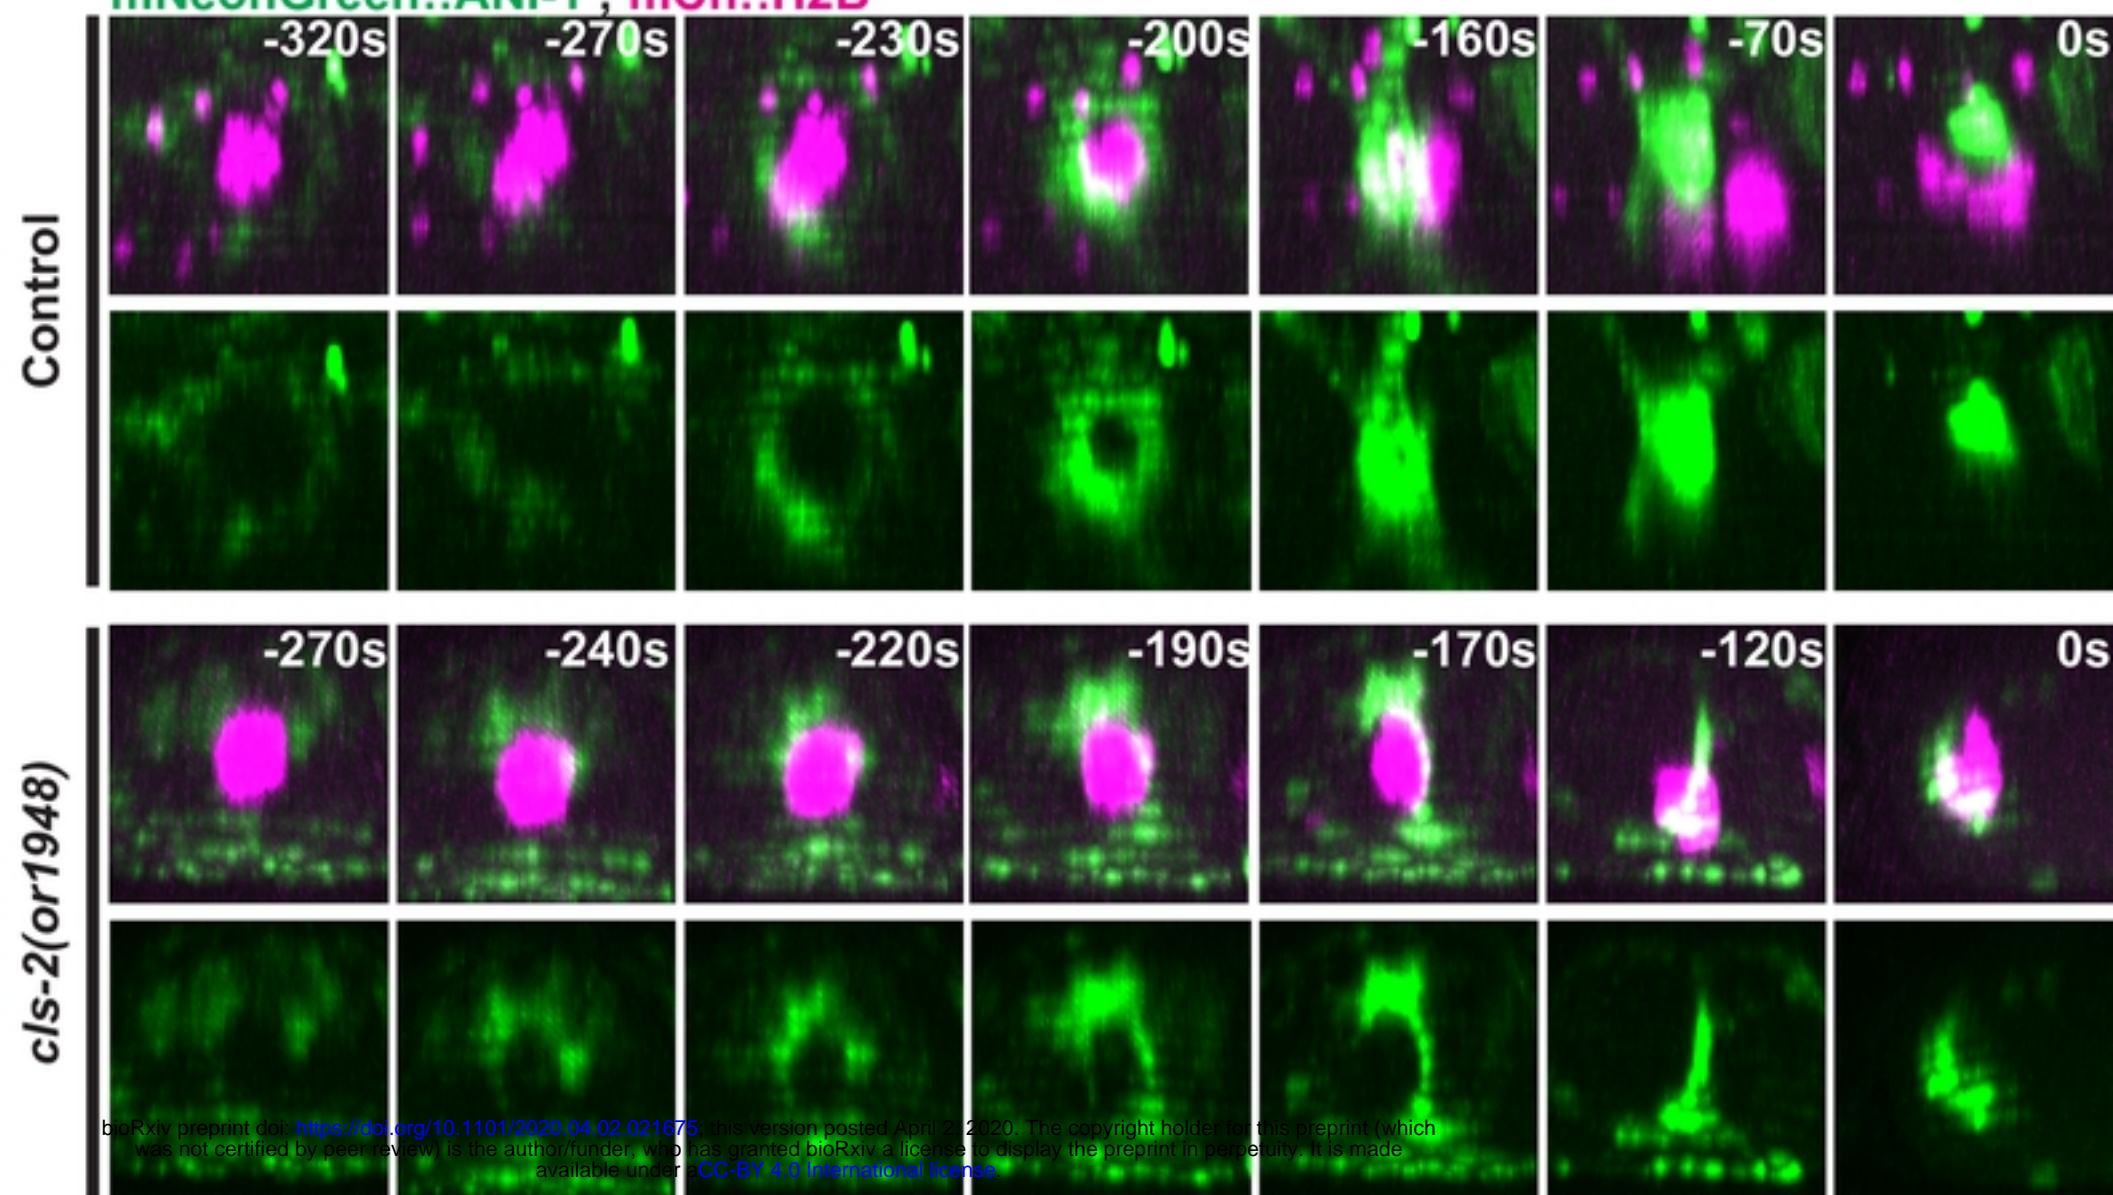

B

NMY-2::mKate2 ; mNeonGreen::ANI-1 ; mCh::H2B

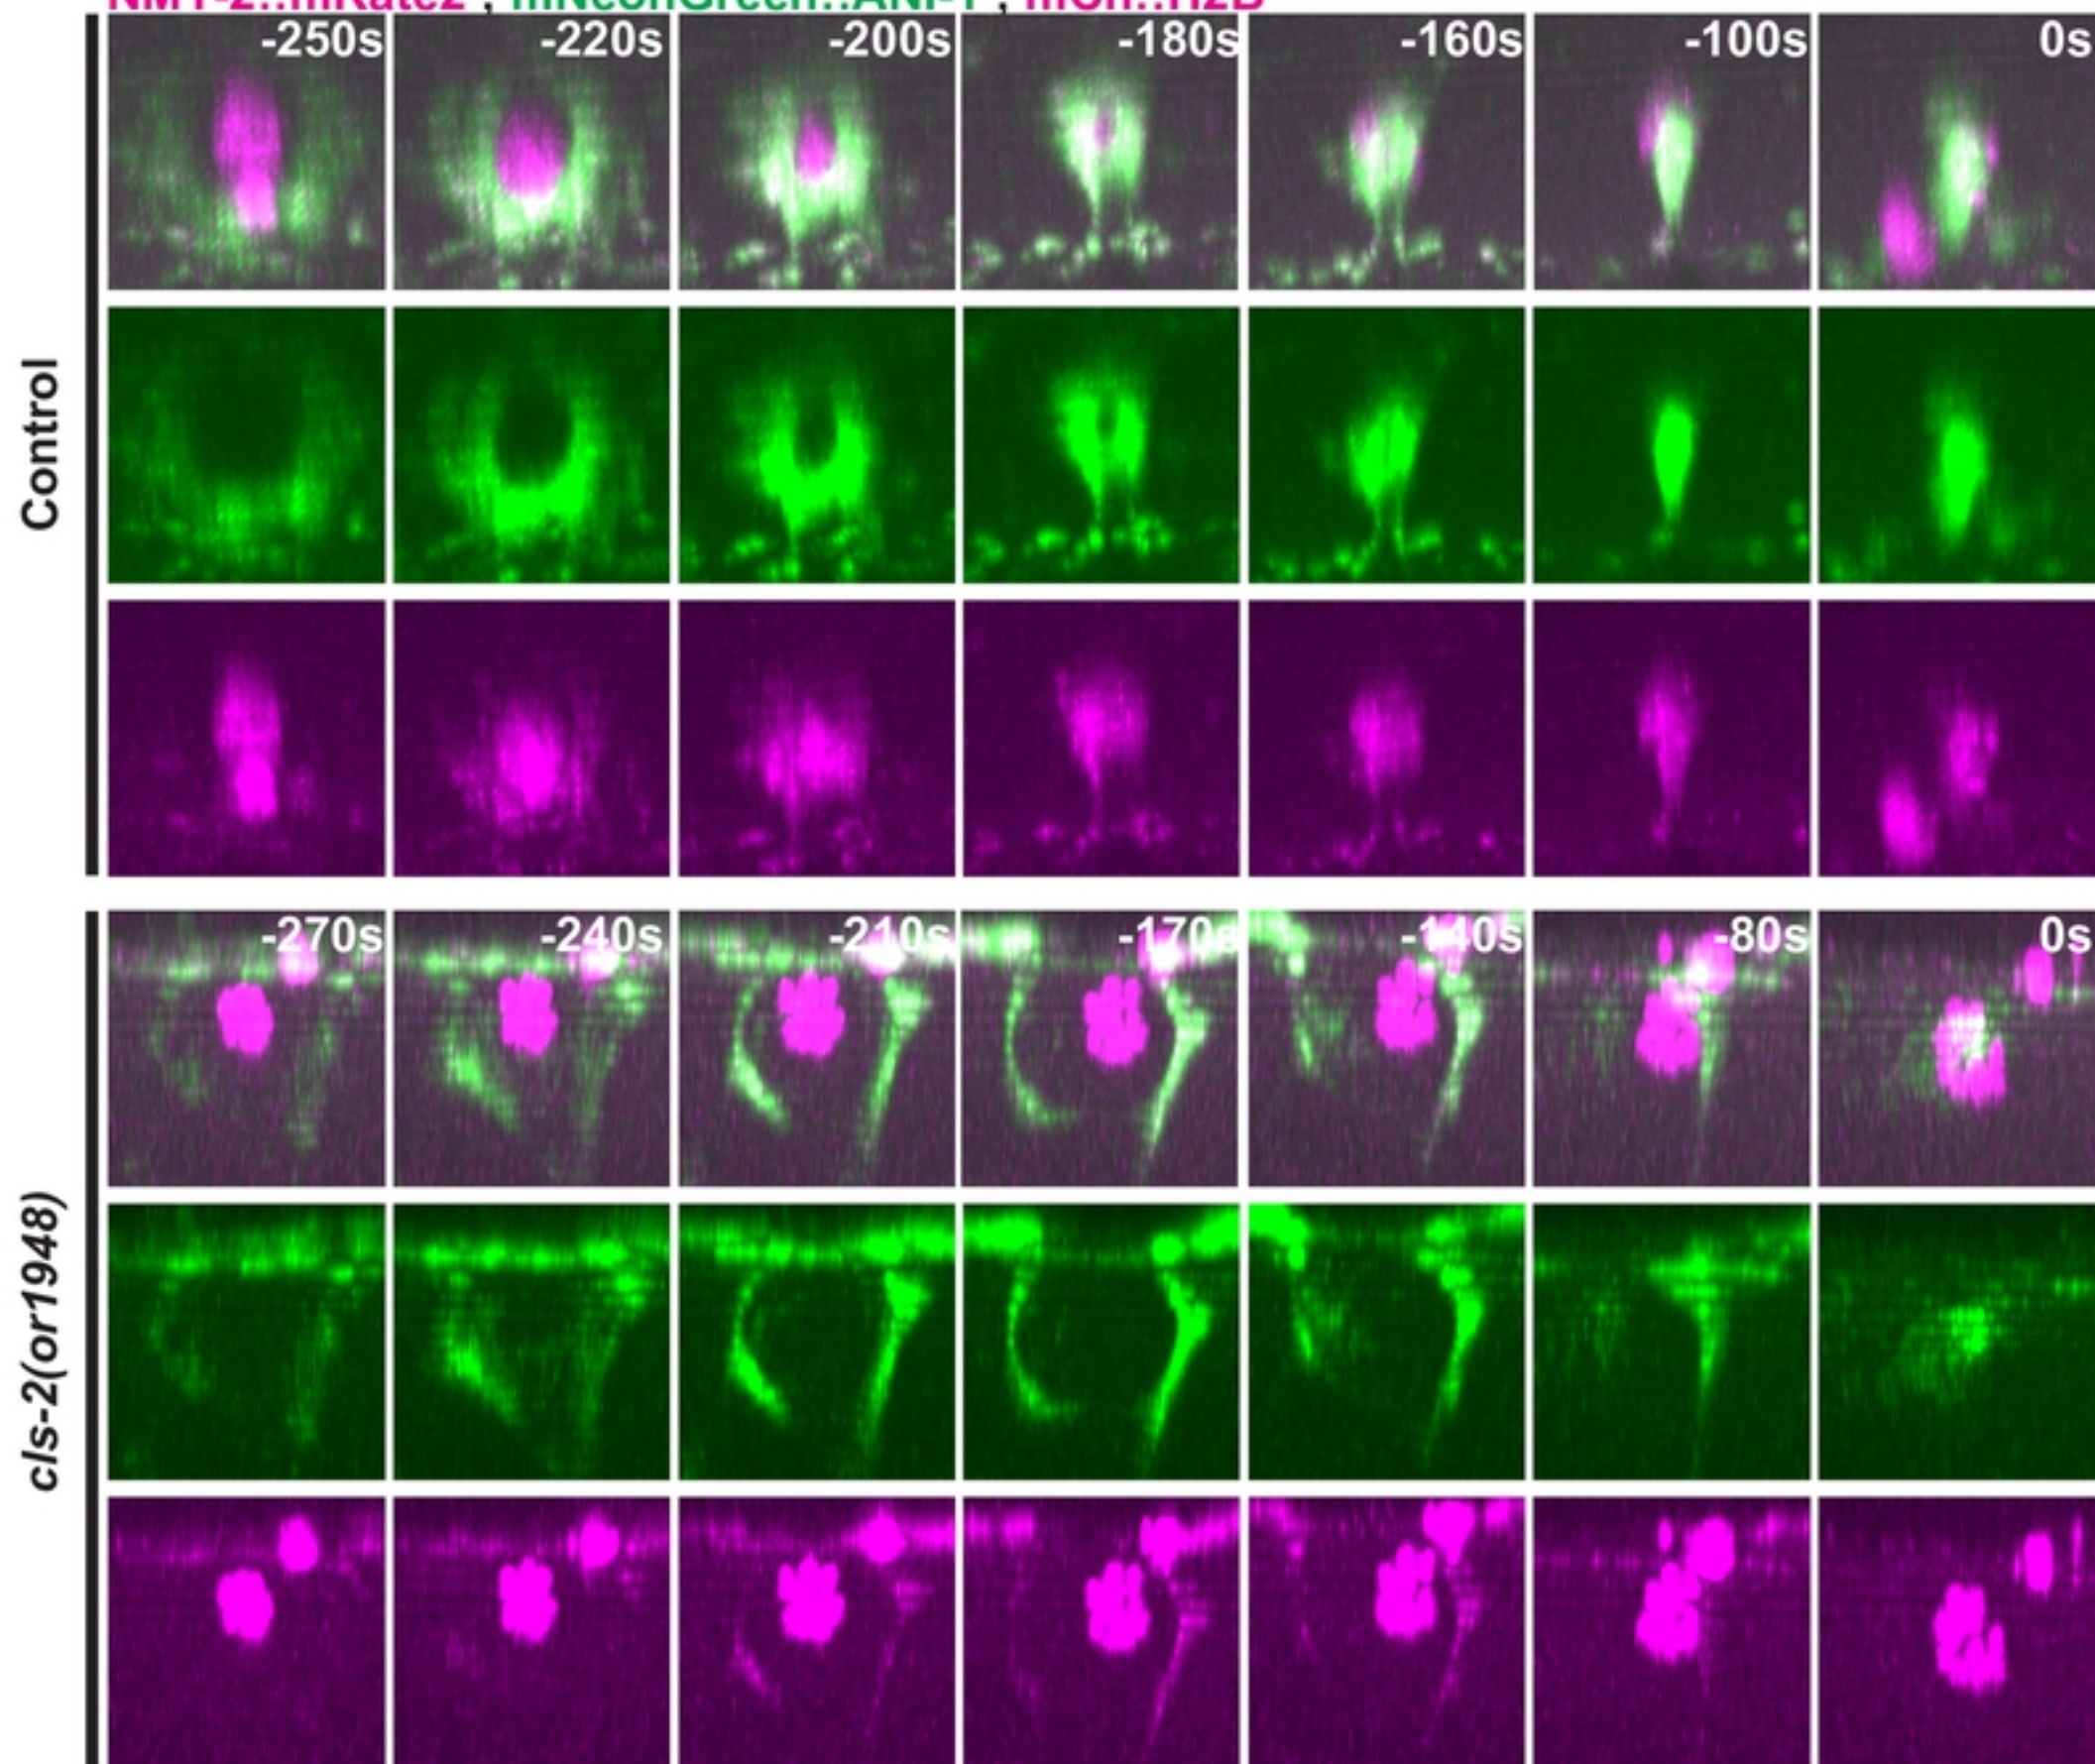

Fig 6



A

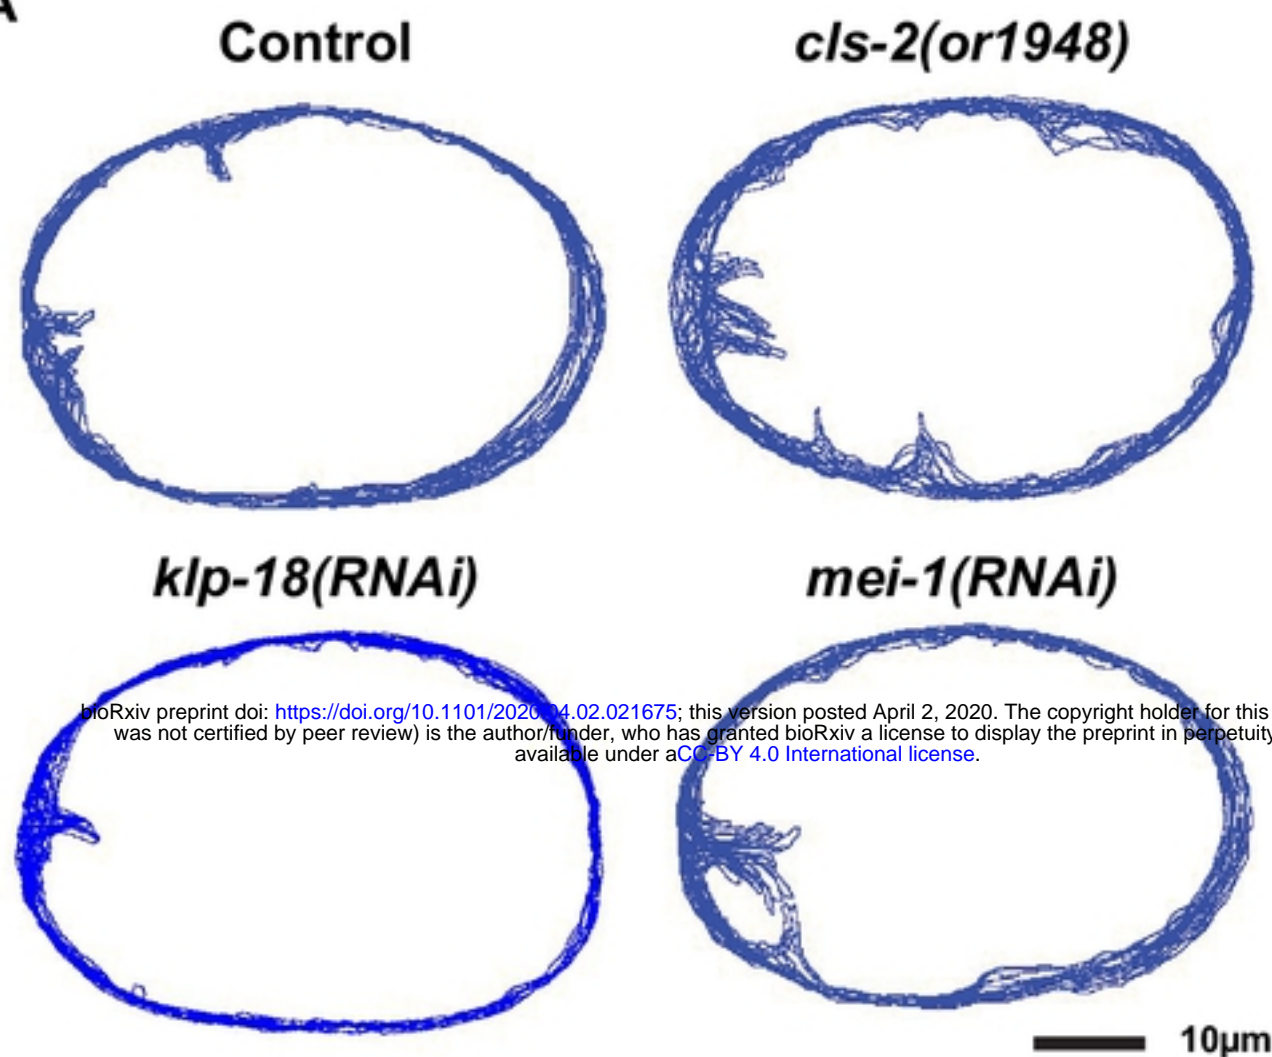

B

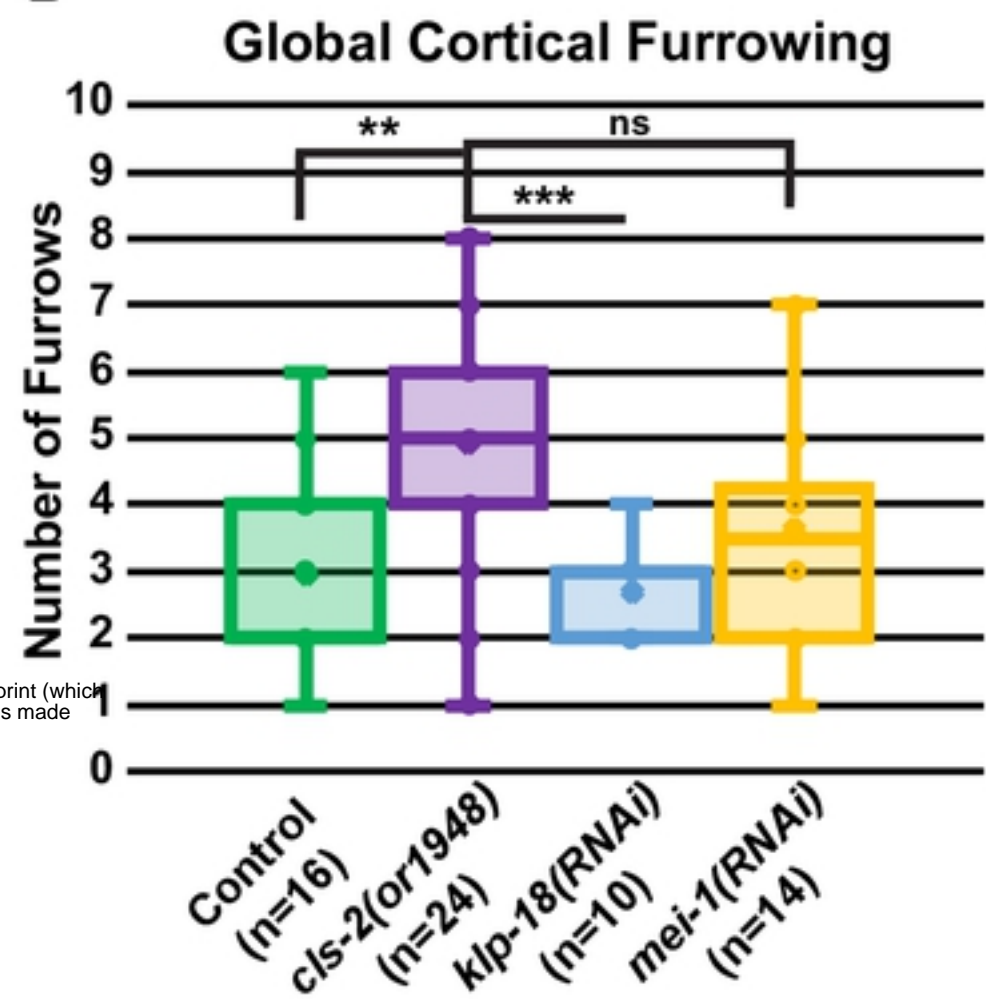

C

NMY-2::GFP; mCh::H2B

10µm

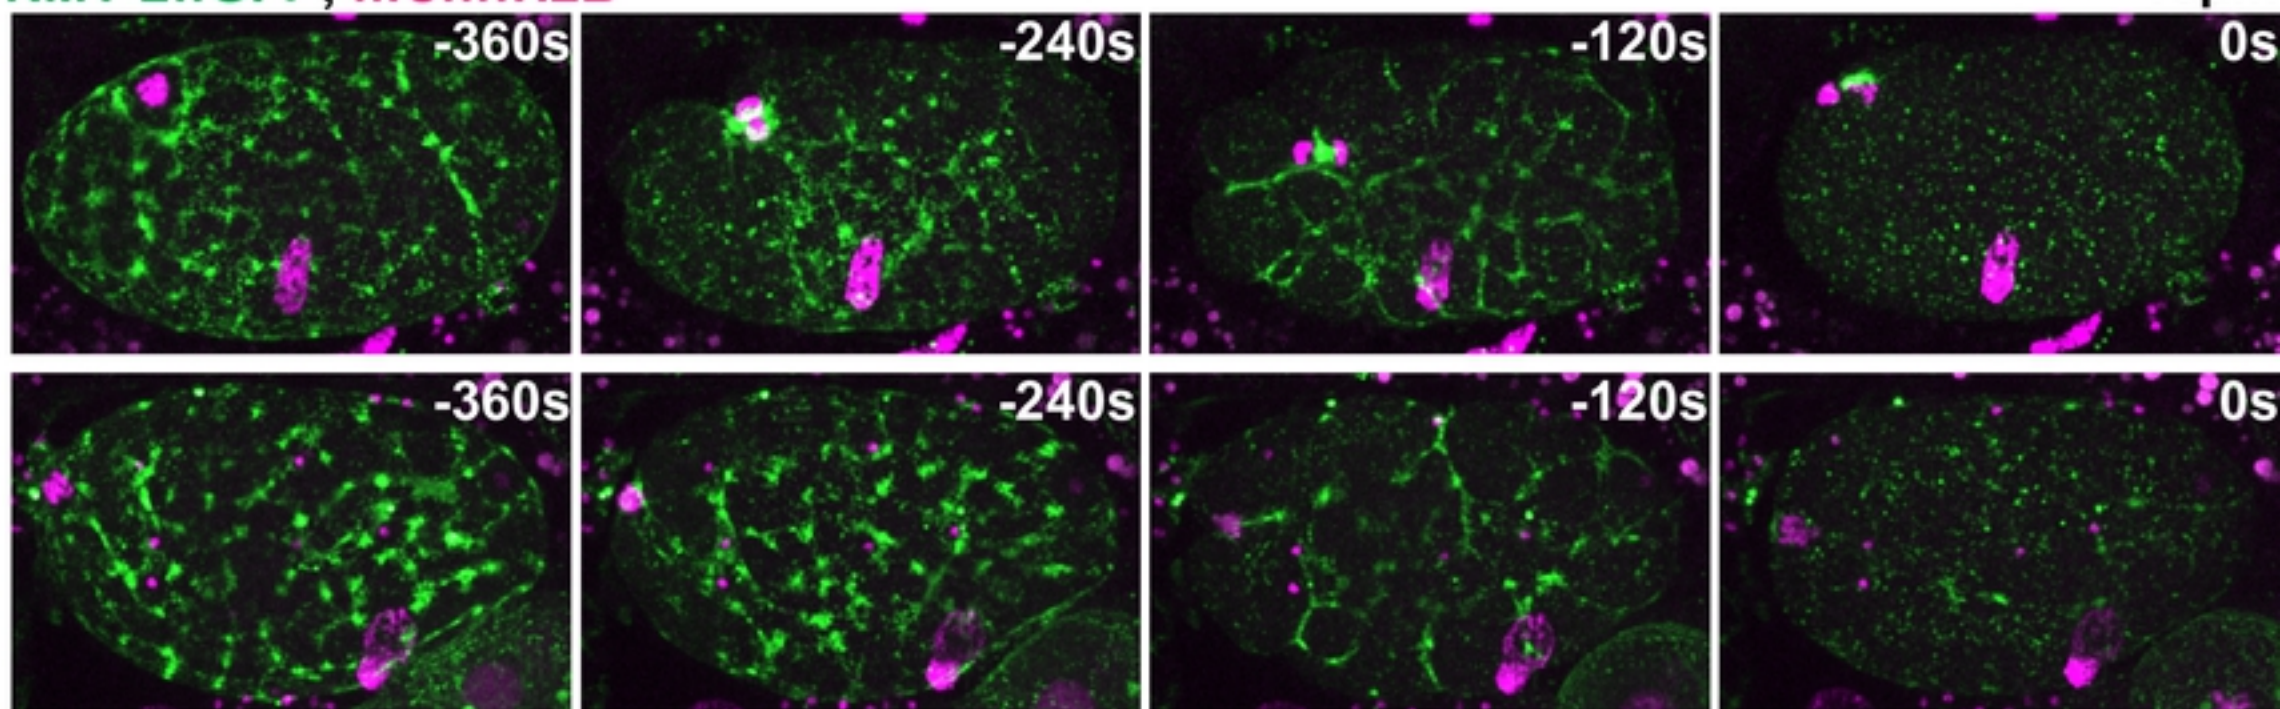

D

mNeonGreen::ANI-1; mCh::H2B

10µm

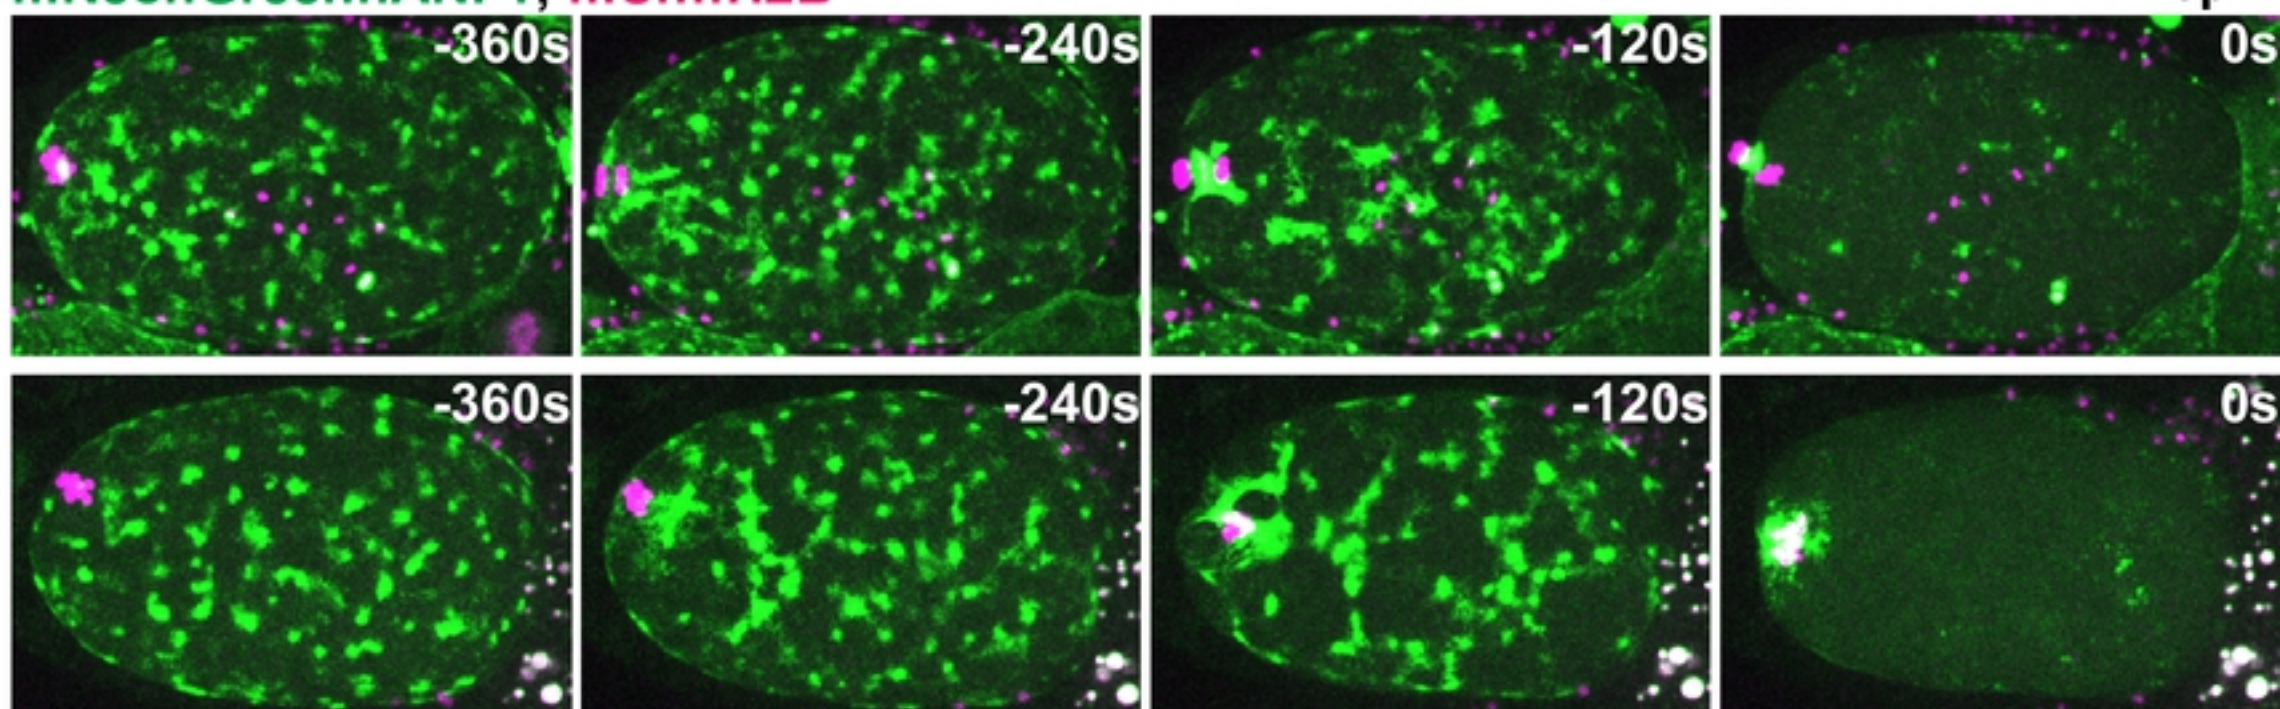

Source: https://www.biorxiv.org/content/10.1101/2020.04.02.021675v1.full.pdf
